# Supplementary material
Source: publisher figshare collection journal article supplement (https://tandf.figshare.com/ndownloader/files/22933325)
Supplement: Supplementary file 1 [file 22933325]

Design, synthesis and bioactivity evaluation of novel thioether derivatives containing a sulfonohydrazide moiety

Pei Li 1,#, Junliang Zhou 2,#, Yan Liu 3, Xiang Wang 1

1 Qiandongnan Engineering and Technology Research Center for Comprehensive Utilization of National Medicine/Key Laboratory for Modernization of Qiandongnan Miao & Dong Medicine, Kaili University, Kaili 556011, P.R. China

2 Guizhou Fruit Institute, Guizhou Academy of Agricultural Sciences, Guiyang, 550025 P.R. China

3 National Chemical Low Carbon Technology and Engineering Center, Kunshan, 215300 P.R. China

Email: pl19890627@126.com (P.L.), gzhwx0828@126.com (X.W.)

**Supplemental Materials**

**Table S 1**: *In vitro* antibacterial activity of the target compounds against *Xoo* and *Xac*.

| **Compounds** | Inhibition rate (%) | | | |
| --- | --- | --- | --- | --- |
| *Xoo* | | *Xac* | |
| 200 (μg/mL) | 100 (μg/mL) | 200 (μg/mL) | 100 (μg/mL) |
| **4a** | 71±1.06 | 54±2.64 | 60±2.39 | 48±3.06 |
| **4b** | 60±1.25 | 50±4.62 | 56±2.62 | 45±1.65 |
| **4c** | 40±0.98 | 32±0.95 | 35±1.62 | 30±1.65 |
| **4d** | 48±2.49 | 41±1.32 | 42±2.97 | 35±2.46 |
| **4e** | 77±3.62 | 61±1.52 | 70±2.62 | 53±1.65 |
| **4f** | 74±3.51 | 57±2.19 | 62±1.56 | 50±0.98 |
| **4g** | 88±1.49 | 75±2.65 | 83±1.13 | 70±3.21 |
| **4h** | 57±2.09 | 48±2.94 | 54±2.13 | 40±1.65 |
| **4i** | 66±1.62 | 50±3.01 | 63±2.62 | 51±2.19 |
| **4j** | 38±3.01 | 30±2.01 | 35±1.60 | 25±2.65 |
| **4k** | 32±1.32 | 25±0.98 | 20±2.65 | 18±1.65 |
| **4l** | 18±1.16 | 10±2.19 | 10±1.65 | 8±2.59 |
| **4m** | 25±0.46 | 19±2.26 | 21±1.89 | 16±2.45 |
| **4n** | 47±2.68 | 40±3.10 | 41±2.62 | 34±2.23 |
| **4o** | 42±1.18 | 35±2.65 | 40±2.56 | 30±2.46 |
| **4p** | 95±0.59 | 85±1.65 | 88±4.01 | 76±1.35 |
| Bismerthiazol | 70±0.89 | 52±1.62 | 55±2.43 | 32±3.26 |
| Thiodiazole copper | 63±2.71 | 45±2.65 | 36±1.56 | 16±2.19 |

**Table S 2**: The EC50 values of some of the target compounds against *Xoo* and *Xac*.

| **Compounds** | EC50 (μg/mL) | |
| --- | --- | --- |
| *Xoo* | *Xac* |
| **4a** | 52.12±2.62 | 76.12±3.56 |
| **4b** | 105.62±1.56 | 86.26±2.94 |
| **4e** | 41.88±1.65 | 54.26±1.65 |
| **4f** | 32.99±2.98 | 85.65±5.65 |
| **4g** | 21.87±2.65 | 26.32±2.10 |
| **4i** | 67.59±3.49 | 68.54±2.59 |
| **4p** | 13.75±0.95 | 18.56±2.14 |
| Bismerthiazol | 84.48±2.89 | 145.62±2.65 |
| Thiodiazole copper | 109.65±3.01 | 230.26±2.46 |

*N*'-(2-((4-chlorophenyl)thio)acetyl)-4-fluorobenzenesulfonohydrazide (**4a**). White solid; mp 185−186 oC; yield 85%; 1H NMR (400 MHz, DMSO-*d6*, ppm) *δ*: 10.34 (s, 1H, −NH−), 10.07 (s, 1H, −NH−), 7.80−7.77 (m, 2H, Ph-H), 7.37−7.26 (m, 6H, Ph-H), 3.56 (s, 2H, −SCH2−); 13C NMR (100 MHz, DMSO-*d6*, ppm) *δ*: 167.3, 135.6, 135.1, 131.2, 131.2, 130.1, 129.3, 116.4 (d, *J* = 22.0 Hz, F−C), 116.3, 34.4; HRMS (ESI) [M+Na]+ calcd for C14H12ClFN2O3S2: 396.9854, found: 396.9859; Anal. calcd for C14H12ClFN2O3S2: C 44.86, H 3.23, N 7.47, found: C 44.85, H 3.21, N 7.45.

*N*'-(2-((4-chlorophenyl)thio)acetyl)-4-chlorobenzenesulfonohydrazide (**4b**). White solid; mp 186−187 oC; yield 80%; 1H NMR (400 MHz, DMSO-*d6*, ppm) *δ*: 10.35 (s, 1H, −NH−), 10.16 (s, 1H, −NH−), 7.73 (d, *J* = 8.4 Hz, 2H, Ph-H), 7.52 (d, *J* = 8.4 Hz, 2H, Ph-H), 7.35 (d, *J* = 8.4 Hz, 2H, Ph-H), 7.27 (q, *J* = 2.0 Hz, 2H, Ph-H), 3.56 (s, 2H, −SCH2−); 13C NMR (100 MHz, DMSO-*d6*, ppm) *δ*: 167.4, 138.4, 138.2, 135.0, 131.2, 130.0, 130.0, 129.4, 129.3, 34.3; HRMS (ESI) [M+Na]+ calcd for C14H12Cl2N2O3S2: 390.9739, found: 390.9736; Anal. calcd for C14H12Cl2N2O3S2: C 42.98, H 3.09, N 7.16, found: C 42.99, H 3.11, N 7.15.

*N*'-(2-((4-chlorophenyl)thio)acetyl)-4-methylbenzenesulfonohydrazide (**4c**). White solid; mp 159−160 oC; yield 89%; 1H NMR (400 MHz, DMSO-*d6*, ppm) *δ*: 10.25 (s, 1H, −NH−), 9.90 (s, 1H, −NH−), 7.62 (d, *J* = 8.0 Hz, 2H, Ph-H), 7.37−7.33 (m, 2H, Ph-H), 7.30−7.24 (m, 4H, Ph-H), 3.55 (s, 2H, −SCH2−), 2.34 (s, 3H, −CH3); 13C NMR (100 MHz, DMSO-*d6*, ppm) *δ*: 167.2, 143.6, 136.4, 131.1, 130.1, 129.7, 129.2, 128.1, 34.4, 21.5; HRMS (ESI) [M+Na]+ calcd for C15H15ClN2O3S2: 393.0110, found: 393.0149; Anal. calcd for C15H15ClN2O3S2: C 48.58, H 4.08, N 7.55, found: C 48.56, H 4.09, N 7.53.

*N*'-(2-((4-chlorophenyl)thio)acetyl)benzenesulfonohydrazide (**4d**). White solid; mp 177−178 oC; yield 79%; 1H NMR (400 MHz, DMSO-*d6*, ppm) *δ*: 10.20 (s, 2H, 2 × −NH−), 7.74 (dd, *J*1 = *J*2 = 1.2 Hz, 2H, Ph-H), 7.64−7.60 (m, 1H, Ph-H), 7.51−7.47 (m, 2H, Ph-H), 7.36−7.33 (m, 2H, Ph-H), 7.30−7.26 (m, 2H, Ph-H), 3.56 (s, 2H, −SCH2−); 13C NMR (100 MHz, DMSO-*d6*, ppm) *δ*: 167.3, 139.3, 135.1, 133.4, 131.2, 130.2, 129.3, 128.2, 128.0, 34.6; HRMS (ESI) [M+Na]+ calcd for C14H13ClN2O3S2: 378.9948, found: 378.9951; Anal. calcd for C14H13ClN2O3S2: C 47.12, H 3.67, N 7.85, found: C 47.14, H 3.69, N 7.83.

*N*'-(2-((4-chlorophenyl)thio)acetyl)propane-1-sulfonohydrazide (**4e**). White solid; mp 115−116 oC; yield 72%; 1H NMR (400 MHz, DMSO-*d6*, ppm) *δ*: 9.90 (s, 2H, 2 × −NH−), 7.42−7.36 (m, 4H, Ph-H), 3.71 (s, 2H, −SCH2−), 2.83−2.79 (m, 2H, −CH2−), 1.75−1.65 (m, 2H, −CH2−), 0.88 (t, *J* = 7.2 Hz, 3H, −CH3); 13C NMR (100 MHz, DMSO-*d6*, ppm) *δ*: 168.0, 134.9, 131.4, 130.6, 129.4, 53.2, 34.7, 17.0, 13.2; HRMS (ESI) [M+Na]+ calcd for C11H15ClN2O3S2: 345.0110, found: 345.0158; Anal. calcd for C11H15ClN2O3S2: C 40.93, H 4.68, N 8.68, found: C 40.94, H 4.69, N 8.67.

*N*'-(2-((4-chlorophenyl)thio)acetyl)butane-1-sulfonohydrazide (**4f**). White solid; mp 125−126 oC; yield 70%; 1H NMR (400 MHz, DMSO-*d6*, ppm) *δ*: 10.02 (s, 2H, 2 × −NH−), 7.42−7.35 (m, 4H, Ph-H), 3.71 (s, 2H, −SCH2−), 2.82 (t, *J* = 8.0 Hz, 2H, −CH2−), 1.67−1.63 (m, 2H, −CH2−), 1.30−1.25 (m, 2H, −CH2−), 0.83 (t, *J* = 7.2 Hz, 3H, −CH3); 13C NMR (100 MHz, DMSO-*d6*, ppm) *δ*: 168.0, 134.9, 131.3, 130.5, 129.3, 51.3, 34.6, 25.2, 21.4, 13.9; HRMS (ESI) [M+Na]+ calcd for C12H17ClN2O3S2: 359.0267, found: 359.0310; Anal. calcd for C12H17ClN2O3S2: C 42.79, H 5.09, N 8.32, found: C 42.78, H 5.09, N 8.34.

*N*'-(2-((4-fluorophenyl)thio)acetyl)-4-chlorobenzenesulfonohydrazide (**4g**). White solid; mp 165−166 oC; yield 79%; 1H NMR (400 MHz, DMSO-*d6*, ppm) *δ*: 10.31 (s, 1H, −NH−), 10.14 (s, 1H, −NH−), 7.74 (d, *J* = 8.8 Hz, 2H, Ph-H), 7.55 (d, *J* = 8.4 Hz, 2H, Ph-H), 7.34−7.14 (m, 2H, Ph-H), 3.50 (s, 2H, −SCH2−); 13C NMR (100 MHz, DMSO-*d6*, ppm) *δ*: 167.6, 138.4, 138.2, 138.2, 131.6, 131.5, 131.2, 130.0, 129.4, 116.4 (d, *J* = 22. Hz, F−C), 35.3; HRMS (ESI) [M+Na]+ calcd for C14H12ClFN2O3S2: 396.9854, found: 396.9851; Anal. calcd for C14H12ClFN2O3S2: C 44.86, H 3.23, N 7.47, found: C 44.88, H 3.22, N 7.46.

*N*'-(2-((4-fluorophenyl)thio)acetyl)-4-methylbenzenesulfonohydrazide (**4h**). White solid; mp 136−137 oC; yield 84%; 1H NMR (400 MHz, DMSO-*d6*, ppm) *δ*: 10.21 (s, 1H, −NH−), 9.88 (s, 1H, −NH−), 7.63 (d, *J* = 8.0 Hz, 2H, Ph-H), 7.33−7.28 (m, 4H, Ph-H), 7.16 (d, *J* = 9.2 Hz, 2H, Ph-H), 3.50 (s, 2H, −SCH2−), 2.35 (s, 3H, −CH3); 13C NMR (100 MHz, DMSO-*d6*, ppm) *δ*: 167.4, 143.7, 136.4, 131.7, 131.6, 131.3, 129.7, 128.1, 116.5 (d, *J* = 22.0 Hz, F−C), 116.3, 35.5, 21.5; HRMS (ESI) [M+Na]+ calcd for C15H15FN2O3S2: 377.0406, found: 377.0447; Anal. calcd for C15H15FN2O3S2: C 50.83, H 4.27, N 7.90, found: C 50.82, H 4.26, N 7.88.

*N*'-(2-((4-fluorophenyl)thio)acetyl)benzenesulfonohydrazide (**4i**). White solid; mp 180−181 oC; yield 81%; 1H NMR (400 MHz, DMSO-*d6*, ppm) *δ*: 10.24 (s, 1H, −NH−), 9.99 (s, 1H, −NH−), 7.75 (d, *J* = 7.2 Hz, 2H, Ph-H), 7.63 (t, *J* = 7.2 Hz, 1H, Ph-H), 7.51 (t, *J* = 8.0 Hz, 2H, Ph-H), 7.34−7.31 (m, 2H, Ph-H), 7.18−7.13 (m, 2H, Ph-H), 3.50 (s, 2H, −SCH2−); 13C NMR (100 MHz, DMSO-*d6*, ppm) *δ*: 167.5, 139.4, 133.4, 131.8, 131.7, 131.3, 129.3, 128.0, 116.4 (d, *J* = 22.0 Hz, F−C), 35.6; HRMS (ESI) [M+Na]+ calcd for C14H13FN2O3S2: 363.0244, found: 363.0248; Anal. calcd for C14H13FN2O3S2: C 49.40, H 3.85, N 8.23, found: C 49.42, H 3.86, N 8.25.

*N*'-(2-(*p*-tolylthio)acetyl)-4-fluorobenzenesulfonohydrazide (**4j**). White solid; mp 161−162 oC; yield 80%; 1H NMR (400 MHz, DMSO-*d6*, ppm) *δ*: 10.29 (s, 1H, −NH−), 10.05 (s, 1H, −NH−), 7.80−7.77 (m, 2H, Ph-H), 7.30 (t, *J* = 8.8 Hz, 2H, Ph-H), 7.14 (dd, *J*1 = 8.8 Hz, *J*2 = 8.0 Hz, 4H, Ph-H), 3.48 (s, 2H, −SCH2−), 2.28 (s, 3H, −CH3); 13C NMR (100 MHz, DMSO-*d6*, ppm) *δ*: 167.6, 136.2, 135.6, 132.2, 131.2, 131.1, 130.0, 129.1, 116.4 (d, *J* = 22.0 Hz, F−C), 35.1, 21.0; HRMS (ESI) [M+Na]+ calcd for C15H15FN2O3S2: 377.0400, found: 377.0405; Anal. calcd for C15H15FN2O3S2: C 50.83, H 4.27, N 7.90, found: C 50.82, H 4.26, N 7.92.

*N*'-(2-(*p*-tolylthio)acetyl)- 4-chlorobenzenesulfonohydrazide (**4k**). White solid; mp 164−165 oC; yield 83%; 1H NMR (400 MHz, DMSO-*d6*, ppm) *δ*: 10.31 (s, 1H, −NH−), 10.13 (s, 1H, −NH−), 7.73−7.71 (m, 2H, Ph-H), 7.54−7.50 (m, 2H, Ph-H), 7.17−7.11 (m, 4H, Ph-H), 3.48 (s, 2H, −SCH2−), 2.28 (s, 3H, −CH3); 13C NMR (100 MHz, DMSO-*d6*, ppm) *δ*: 167.7, 138.3, 138.2, 136.2, 132.2, 130.0, 130.0, 129.4, 129.1, 35.0, 21.0; HRMS (ESI) [M+Na]+ calcd for C15H15ClN2O3S2: 393.0105, found: 393.0101; Anal. calcd for C15H15ClN2O3S2: C 48.58, H 4.08, N 7.55, found: C 48.55, H 4.06, N 7.56.

*N*'-(2-(*p*-tolylthio)acetyl)-4-methylbenzenesulfonohydrazide (**4l**). White solid; mp 138−139 oC; yield 80%; 1H NMR (400 MHz, DMSO-*d6*, ppm) *δ*: 10.19 (s, 1H, −NH−), 9.88 (s, 1H, −NH−), 7.62 (d, *J* = 8.0 Hz, 2H, Ph-H), 7.27 (d, *J* = 8.4 Hz, 2H, Ph-H), 7.17 (d, *J* = 8.8 Hz, 2H, Ph-H), 7.11 (d, *J* = 8.0 Hz, 2H, Ph-H), 3.47 (s, 2H, −SCH2−), 2.35 (s, 3H, −CH3), 2.28 (s, 3H, −CH3); 13C NMR (100 MHz, DMSO-*d6*, ppm) *δ*: 167.5, 143.6, 136.5, 136.1, 132.3, 130.0, 129.7, 129.2, 128.1, 35.1, 21.5, 21.0; HRMS (ESI) [M+Na]+ calcd for C16H18N2O3S2: 373.0657, found: 373.0699; Anal. calcd for C16H18N2O3S2: C 54.84, H 5.18, N 7.99, found: C 54.85, H 5.16, N 7.96.

*N*'-(2-(*p*-tolylthio)acetyl)benzenesulfonohydrazide (**4m**). White solid; mp 139−140 oC; yield 83%; 1H NMR (400 MHz, DMSO-*d6*, ppm) *δ*: 10.23 (s, 1H, −NH−), 9.98 (s, 1H, −NH−), 7.76−7.73 (m, 2H, Ph-H), 7.65−7.61 (m, 1H, Ph-H), 7.52−7.48 (q, 2H, Ph-H), 7.18−7.10 (m, 4H, Ph-H), 3.48 (s, 2H, −SCH2−), 2.28 (s, 3H, −CH3); 13C NMR (100 MHz, DMSO-*d6*, ppm) *δ*: 167.6, 139.4, 136.2, 133.4, 132.3, 130.0, 129.9, 129.3, 128.0, 35.3, 21.0; HRMS (ESI) [M+Na]+ calcd for C15H16N2O3S2: 359.0495, found: 359.0498; Anal. calcd for C15H16N2O3S2: C 53.55, H 4.79, N 8.33, found: C 53.57, H 4.77, N 8.36.

*N*'-(2-(*p*-tolylthio)acetyl)propane-1-sulfonohydrazide (**4n**). White solid; mp 99−100 oC; yield 81%; 1H NMR (400 MHz, DMSO-*d6*, ppm) *δ*: 10.30 (s, 1H, −NH−), 9.51 (s, 1H, −NH−), 7.30−7.28 (m, 2H, Ph-H), 7.13 (d, *J* = 8.0 Hz, Ph-H), 3.64 (s, 2H, −SCH2−), 2.82−2.78 (m, 2H, −CH2−), 2.27 (s, 3H, −CH3), 1.73−1.69 (m, 2H, −CH2−), 0.88 (t, *J* = 7.2 Hz, 3H, −CH3); 13C NMR (100 MHz, DMSO-*d6*, ppm) *δ*: 168.3, 136.4, 132.0, 130.1, 129.6, 53.1, 35.3, 21.0, 17.0, 13.2; HRMS (ESI) [M+Na]+ calcd for C12H18N2O3S2: 325.0656, found: 325.0711; Anal. calcd for C12H18N2O3S2: C 47.66, H 6.00, N 9.26, found: C 47.67, H 5.97, N 9.26.

*N*'-(2-(*p*-tolylthio)acetyl)butane-1-sulfonohydrazide (**4o**). White solid; mp 105−106 oC; yield 85%; 1H NMR (400 MHz, DMSO-*d6*, ppm) *δ*: 10.27 (s, 1H, −NH−), 9.61 (s, 1H, −NH−), 7.82 (d, *J* = 8.0 Hz, 2H, Ph-H), 7.27 (d, *J* = 8.0 Hz, 2H, Ph-H), 3.63 (s, 2H, −SCH2−), 2.82 (t, *J* = 8.0 Hz, 2H, −CH2−), 2.27 (s, 3H, −CH3), 1.70−1.64 (m, 2H, −CH2−), 1.33−1.23 (m, 2H, −CH2−), 0.40 (t, *J* = 7.6 Hz, 3H, −CH3); 13C NMR (100 MHz, DMSO-*d6*, ppm) *δ*: 168.3, 136.3, 132.0, 130.1, 129.5, 51.2, 35.3, 25.3, 21.4, 21.0, 13.9; HRMS (ESI) [M+Na]+ calcd for C13H20N2O3S2: 339.0813, found: 339.0867; Anal. calcd for C13H20N2O3S2: C 49.34, H 6.37, N 8.85, found: C 49.36, H 6.36, N 8.87.

*N*'-(2-(ethylthio)acetyl)-4-fluorobenzenesulfonohydrazide (**4p**). White solid; mp 118−119 oC; yield 80%; 1H NMR (400 MHz, DMSO-*d6*, ppm) *δ*: 10.18 (s, 1H, −NH−), 10.02 (s, 1H, −NH−), 7.89−7.86 (m, 2H, Ph-H), 7.42−7.38 (m, 2H, Ph-H), 2.97 (s, 2H, −SCH2−), 2.38 (q, *J* = 7.6 Hz, 2H, −CH2−), 1.10 (t, *J* = 7.2 Hz, 3H, −CH3); 13C NMR (100 MHz, DMSO-*d6*, ppm) *δ*: 168.4, 135.7, 131.3, 131.2, 116.4 (d, *J* = 22.0 Hz, F−C), 31.9, 25.8, 14.6; HRMS (ESI) [M+Na]+ calcd for C10H13FN2O3S2: 315.0249, found: 315.0305; Anal. calcd for C10H13FN2O3S2: C 41.09, H 4.48, N 9.58, found: C 41.06, H 4.46, N 9.57.


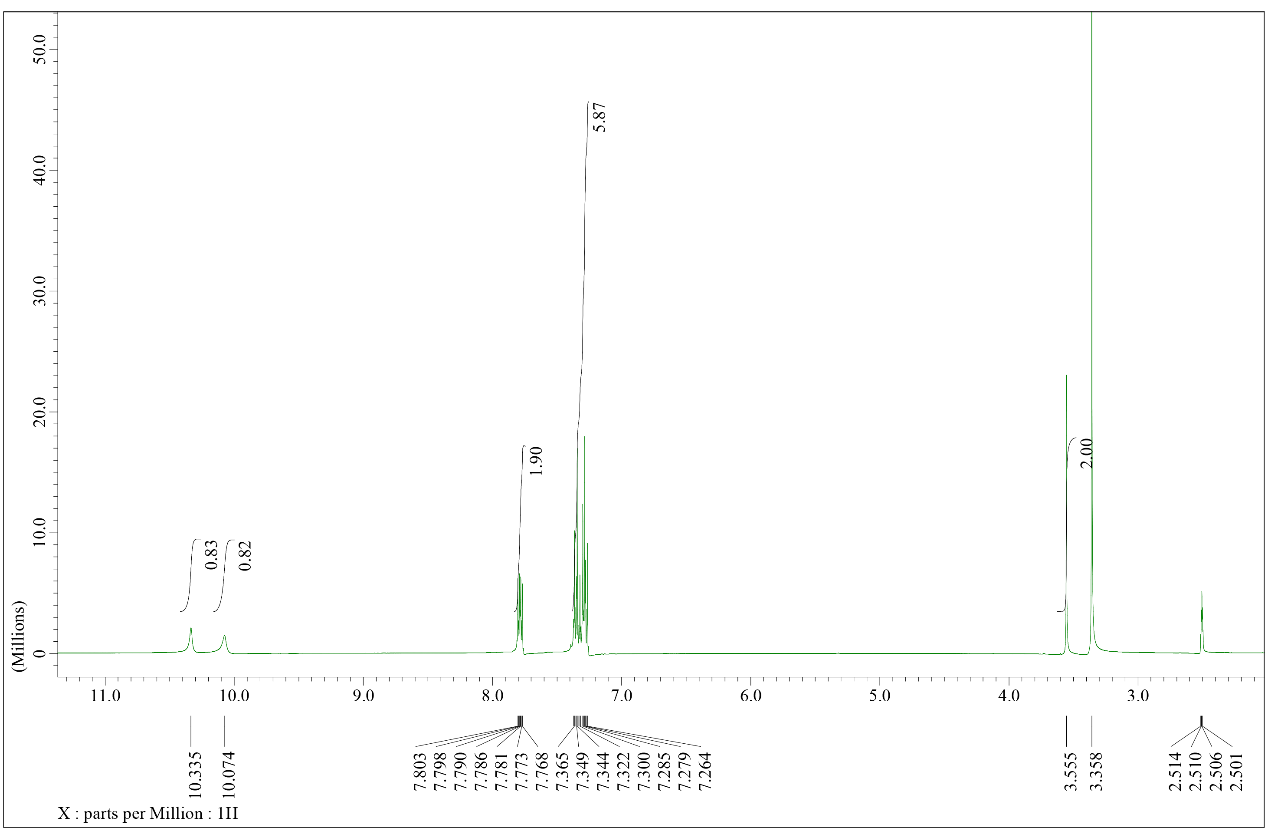


**Figure S 1.** 1H NMR of compound **4a**


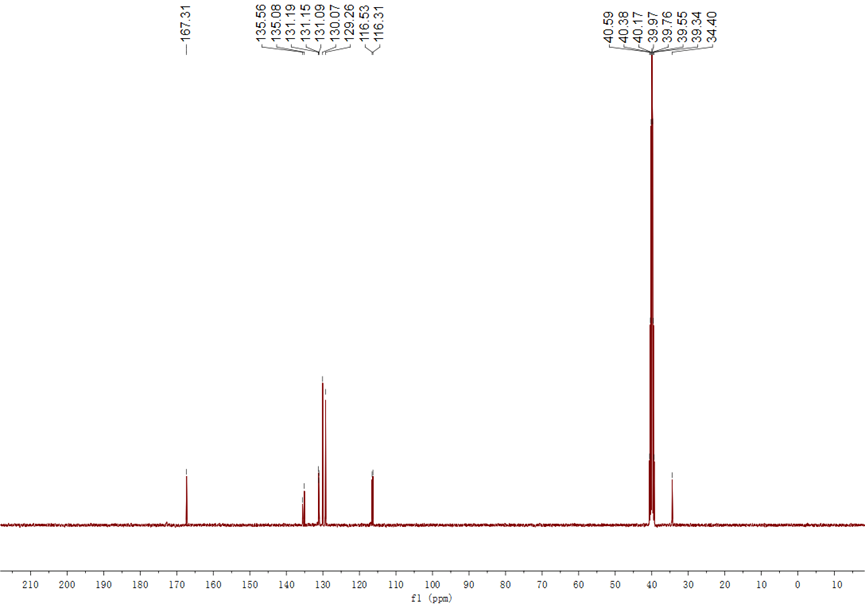


**Figure S 2.** 13C NMR of compound **4a**


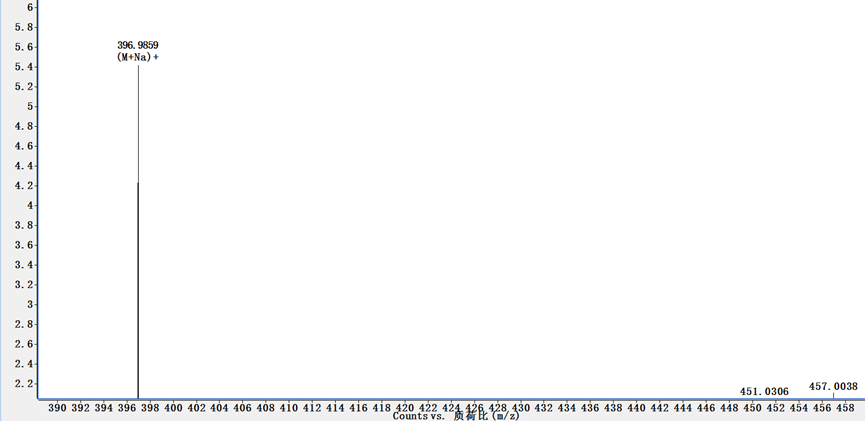


**Figure S 3.** HRMS (ESI) of compound **4­­a**


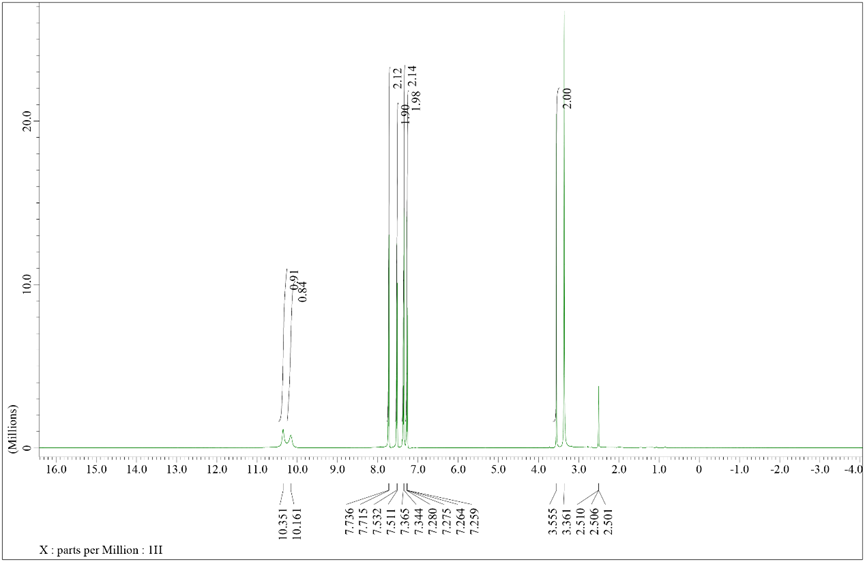


**Figure S 4.** 1H NMR of compound **4b**


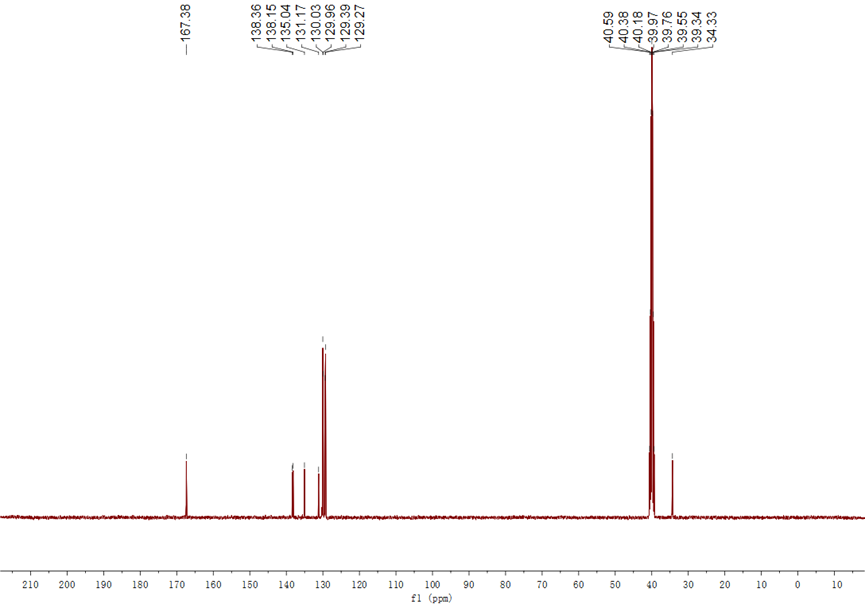


**Figure S 5.** 13C NMR of compound **4b**


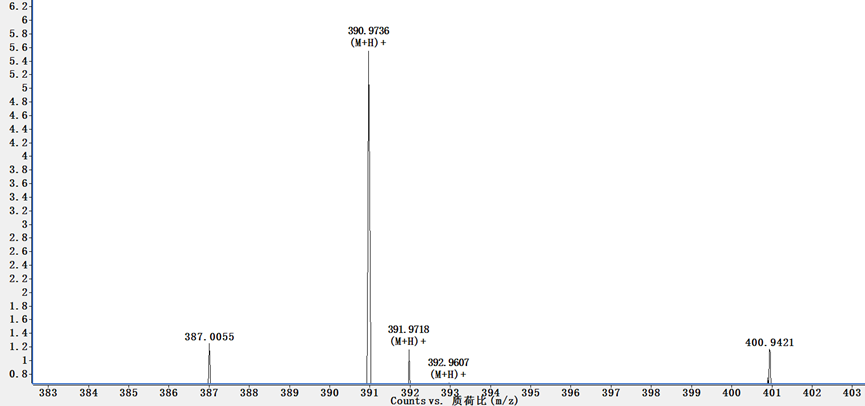


**Figure S 6.** HRMS (ESI) of compound **4­­b**


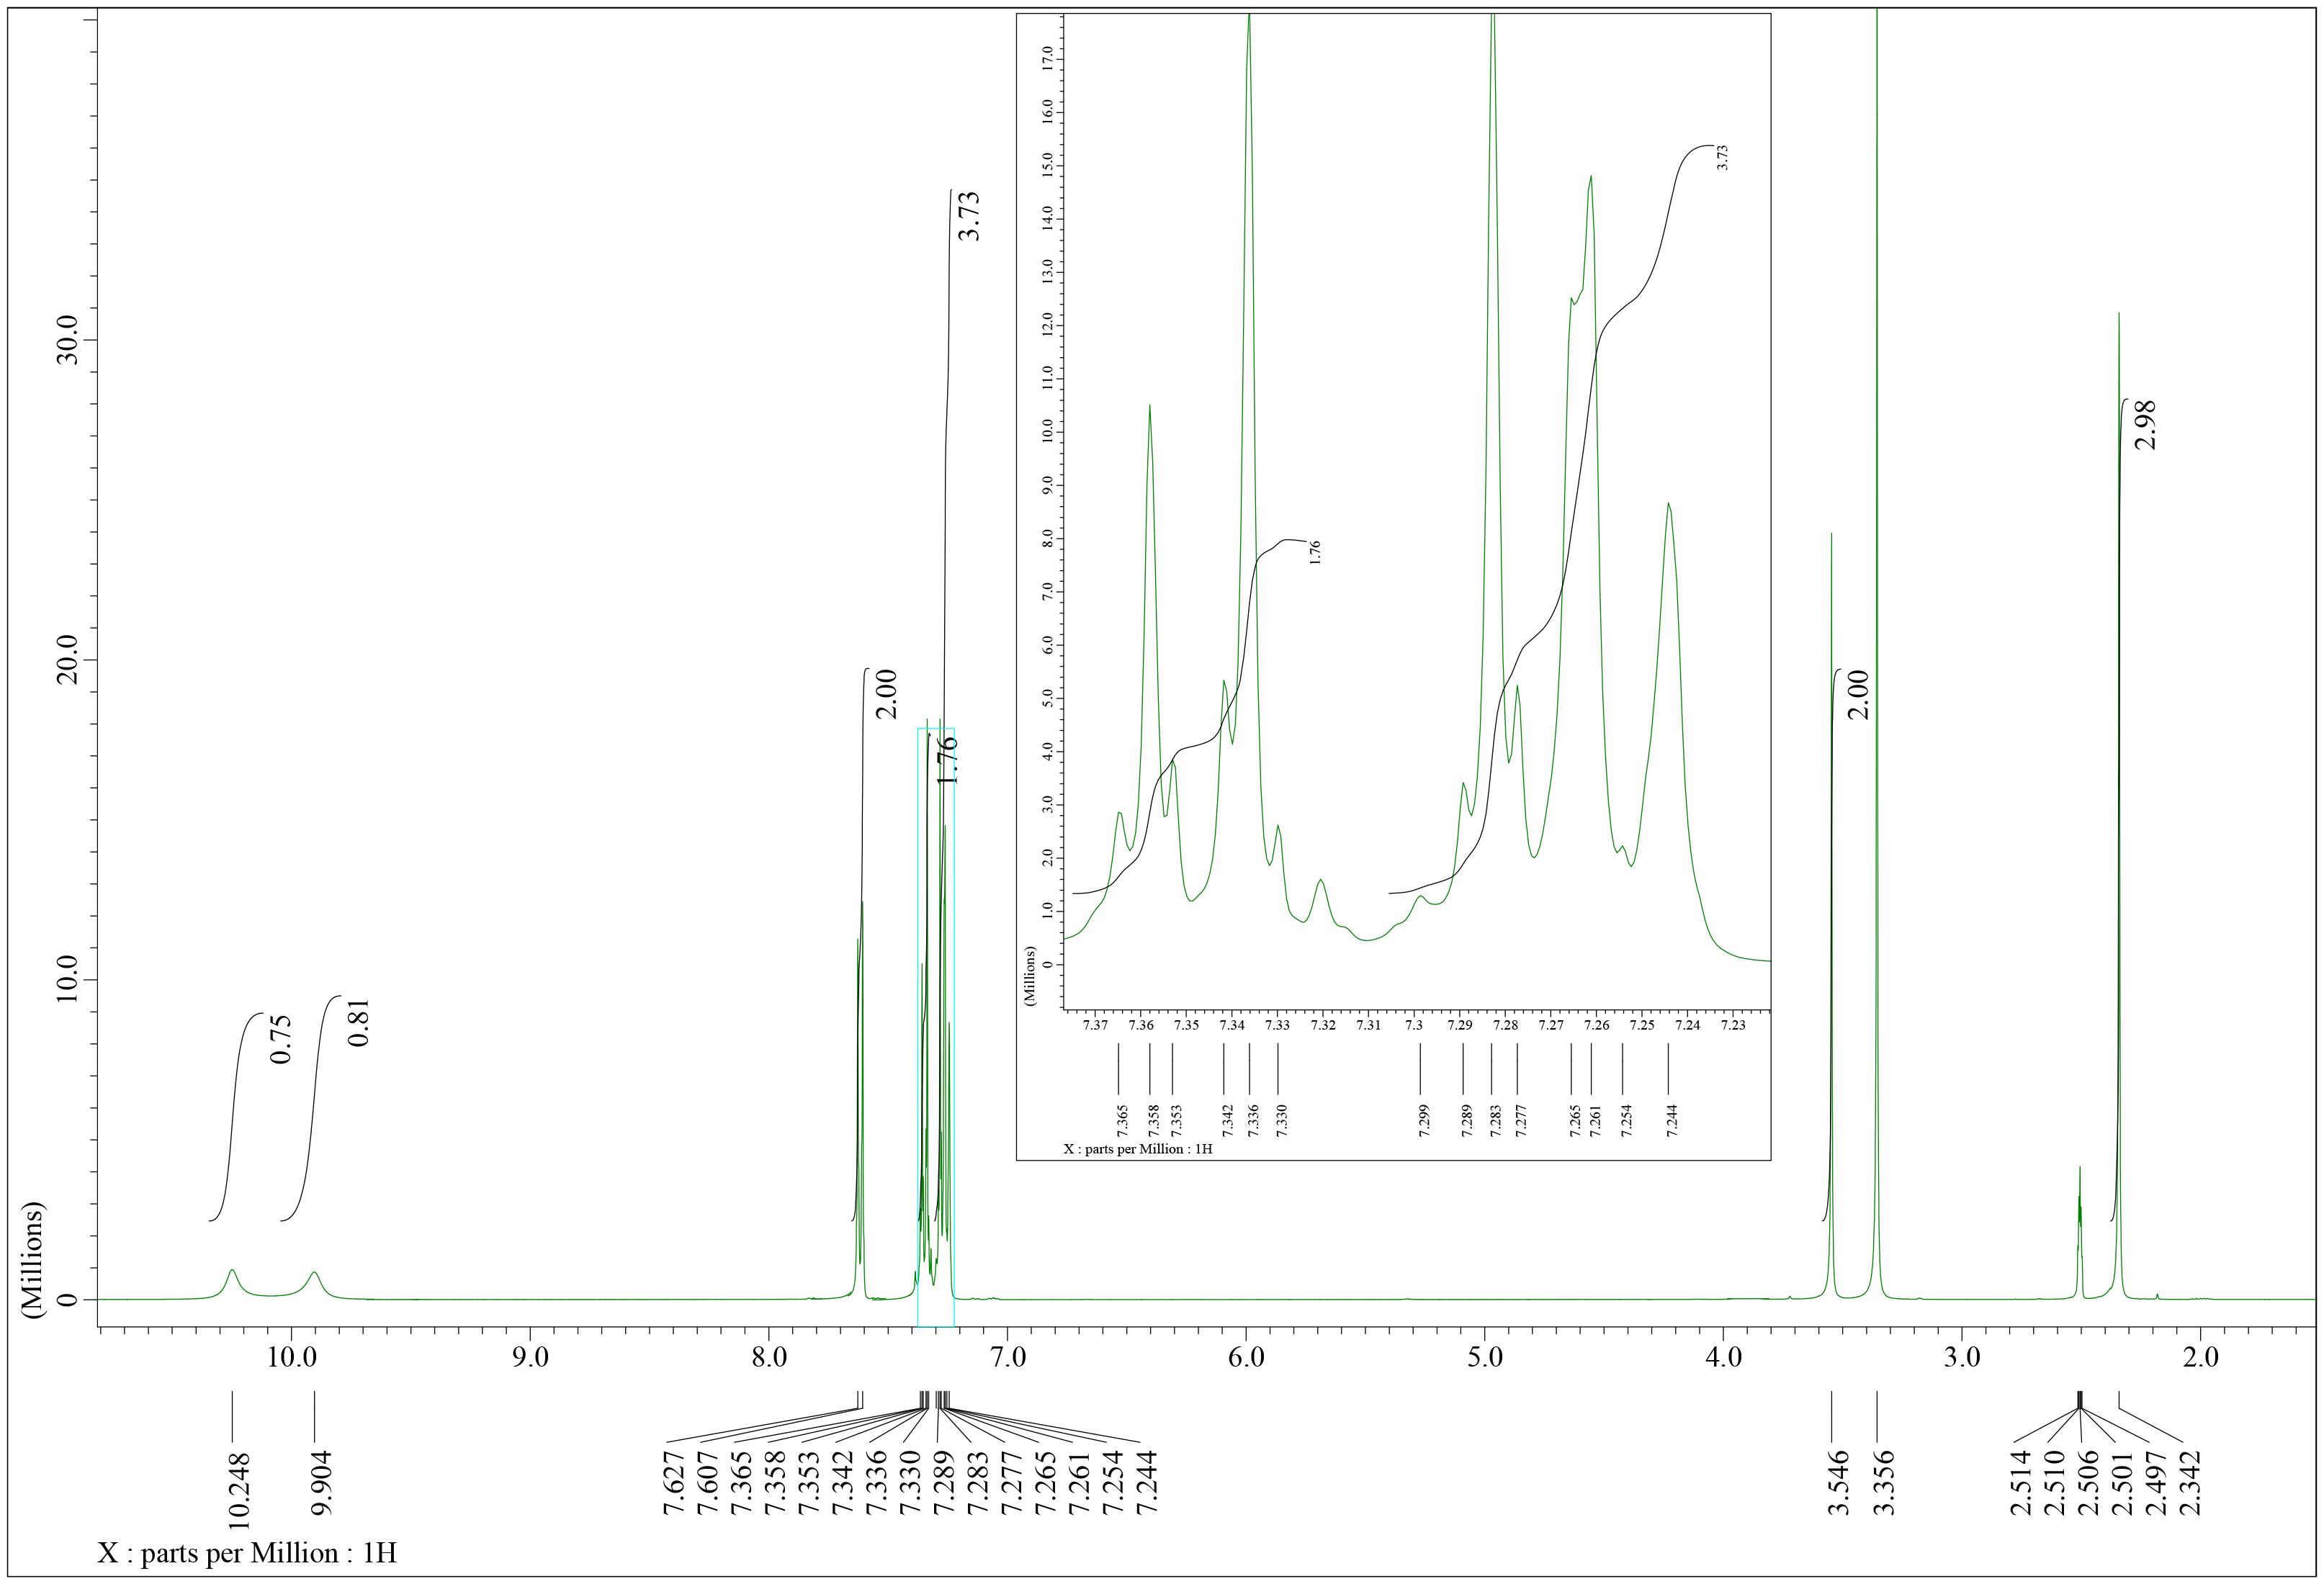


**Figure S 7.** 1H NMR of compound **4c**


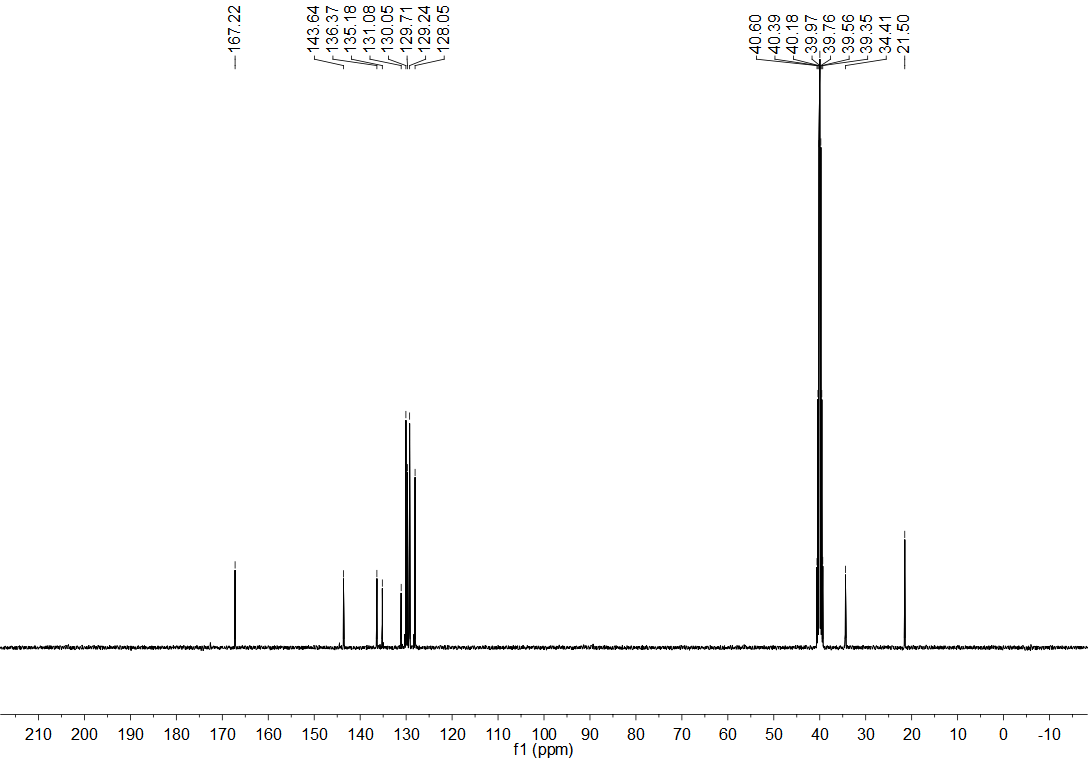


**Figure S 8.**  13C NMR of compound **4c**


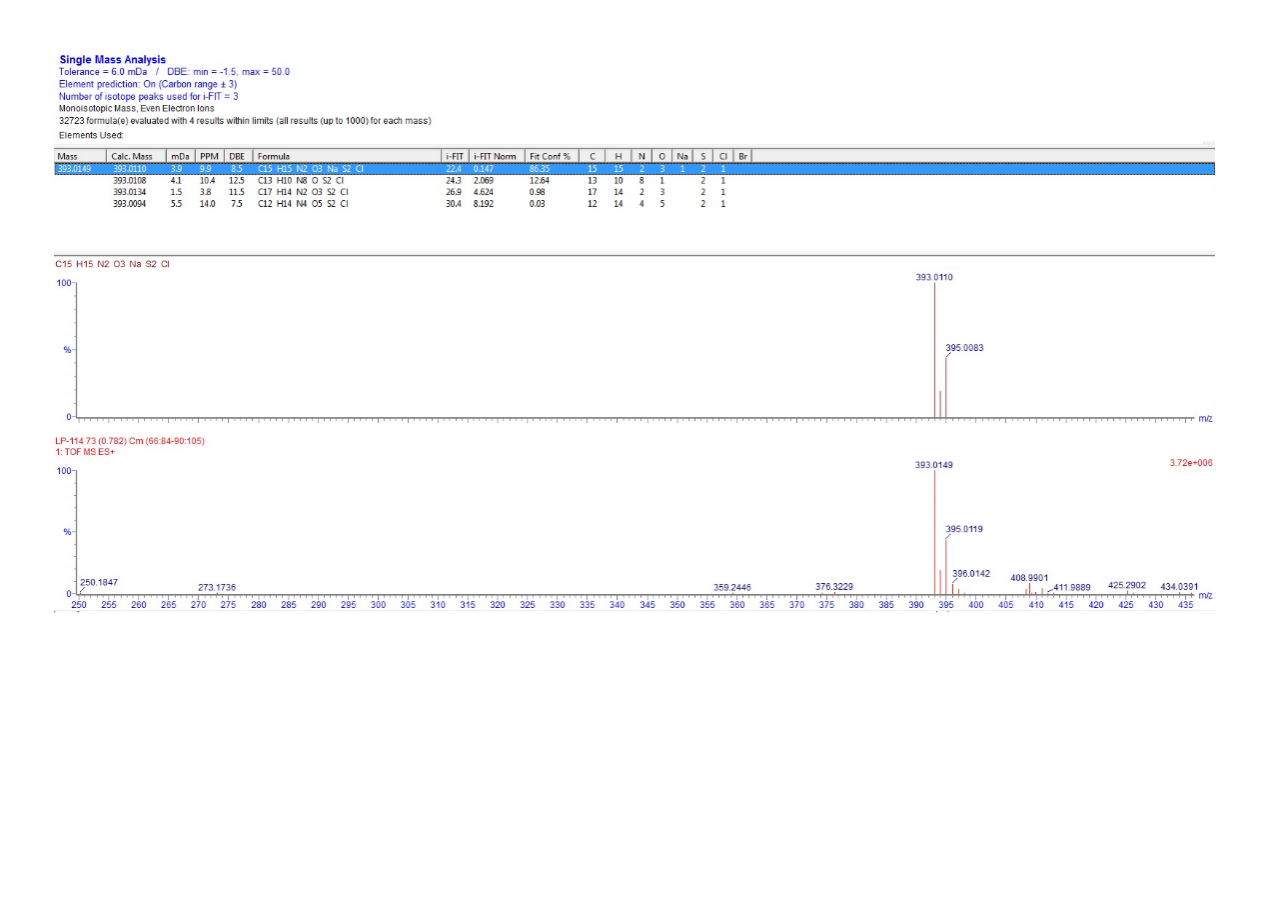


**Figure S 9.** HRMS (ESI) of compound **4­­c**


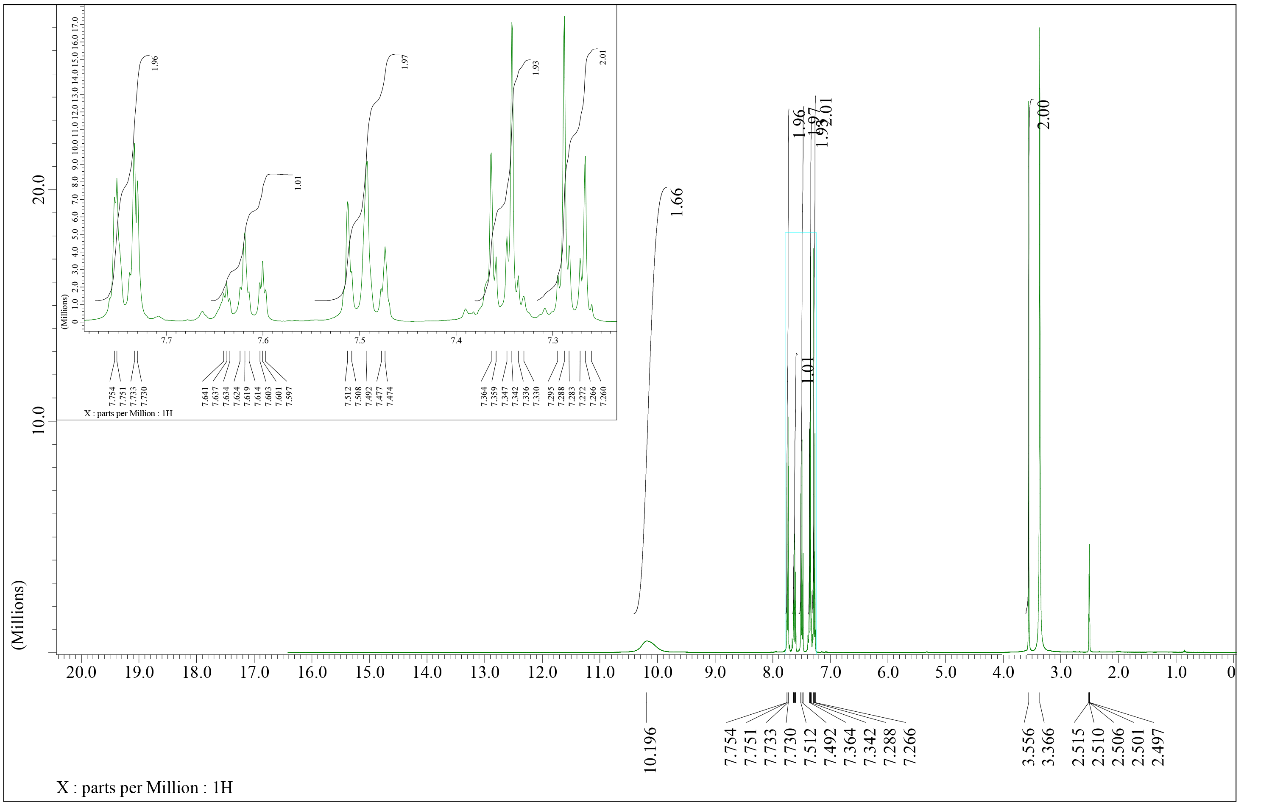


**Figure S 10.** 1H NMR of compound **4d**


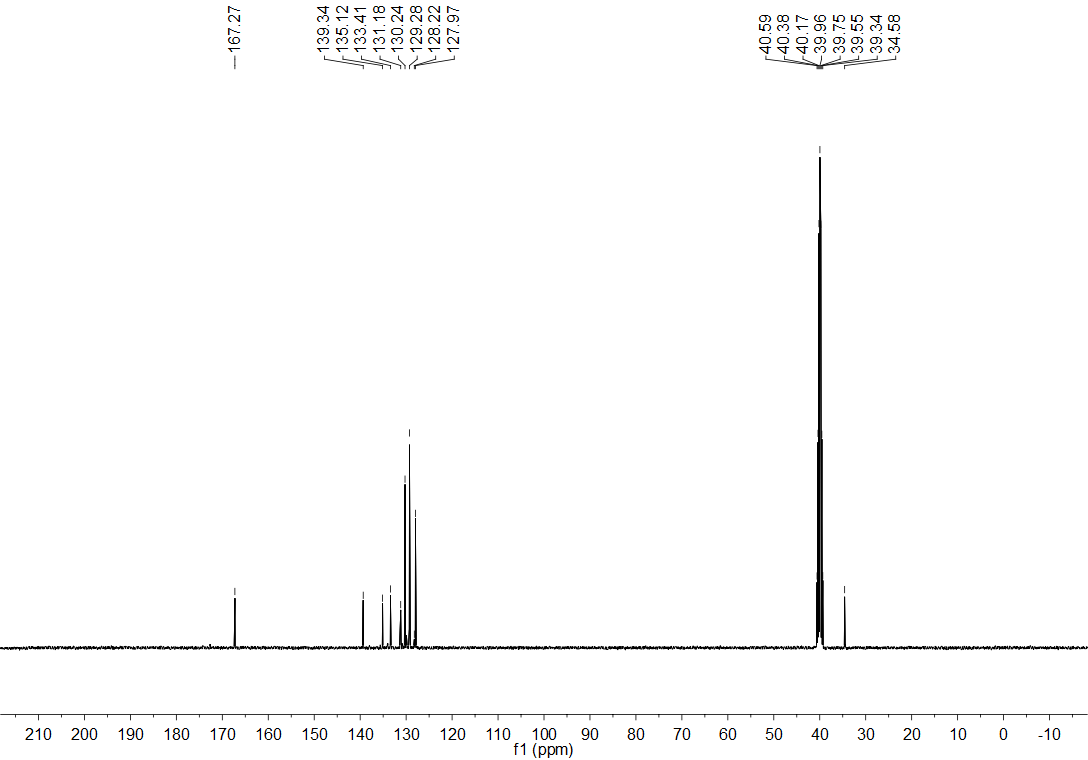


**Figure S 11.** 13C NMR of compound **4d**


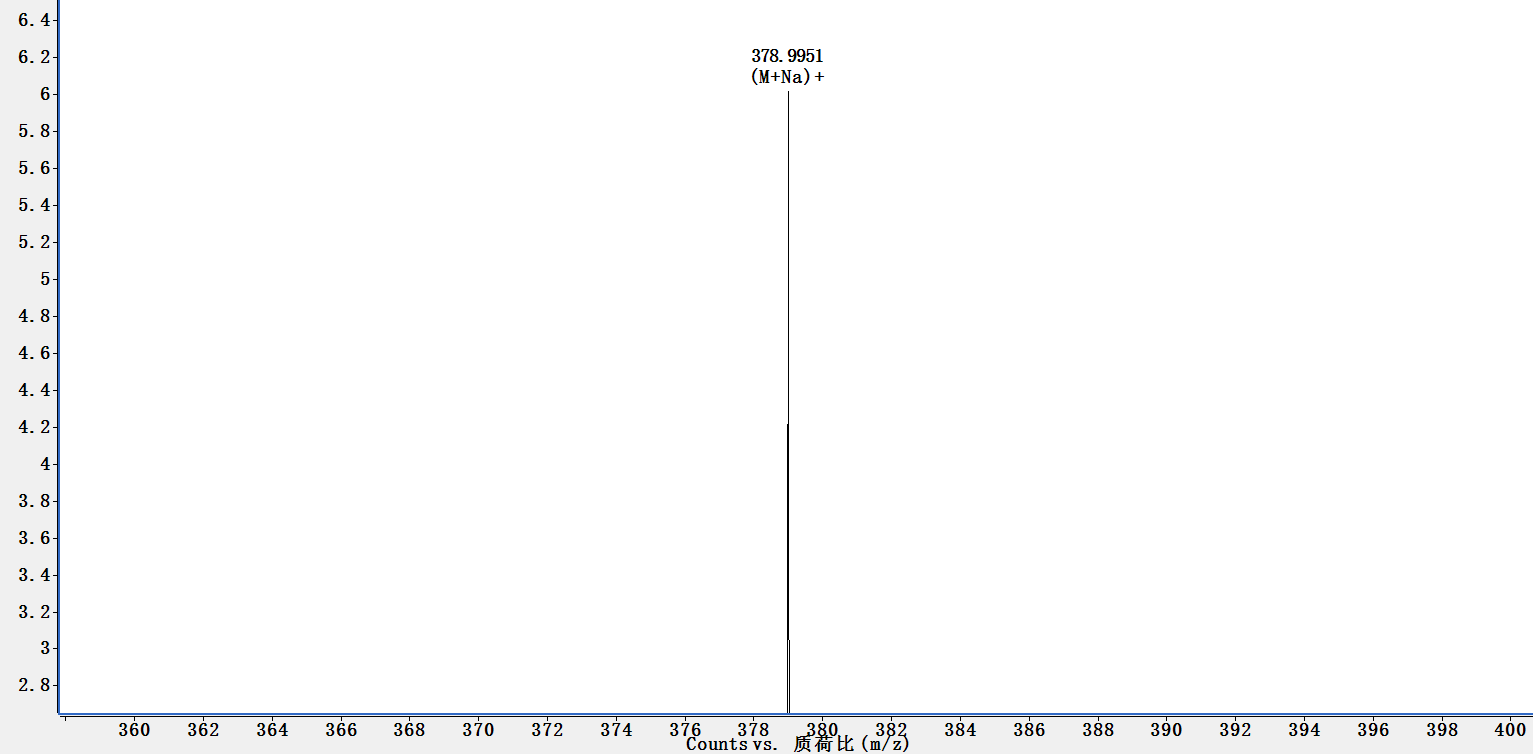


**Figure S 12.** HRMS (ESI) of compound **4­­d**


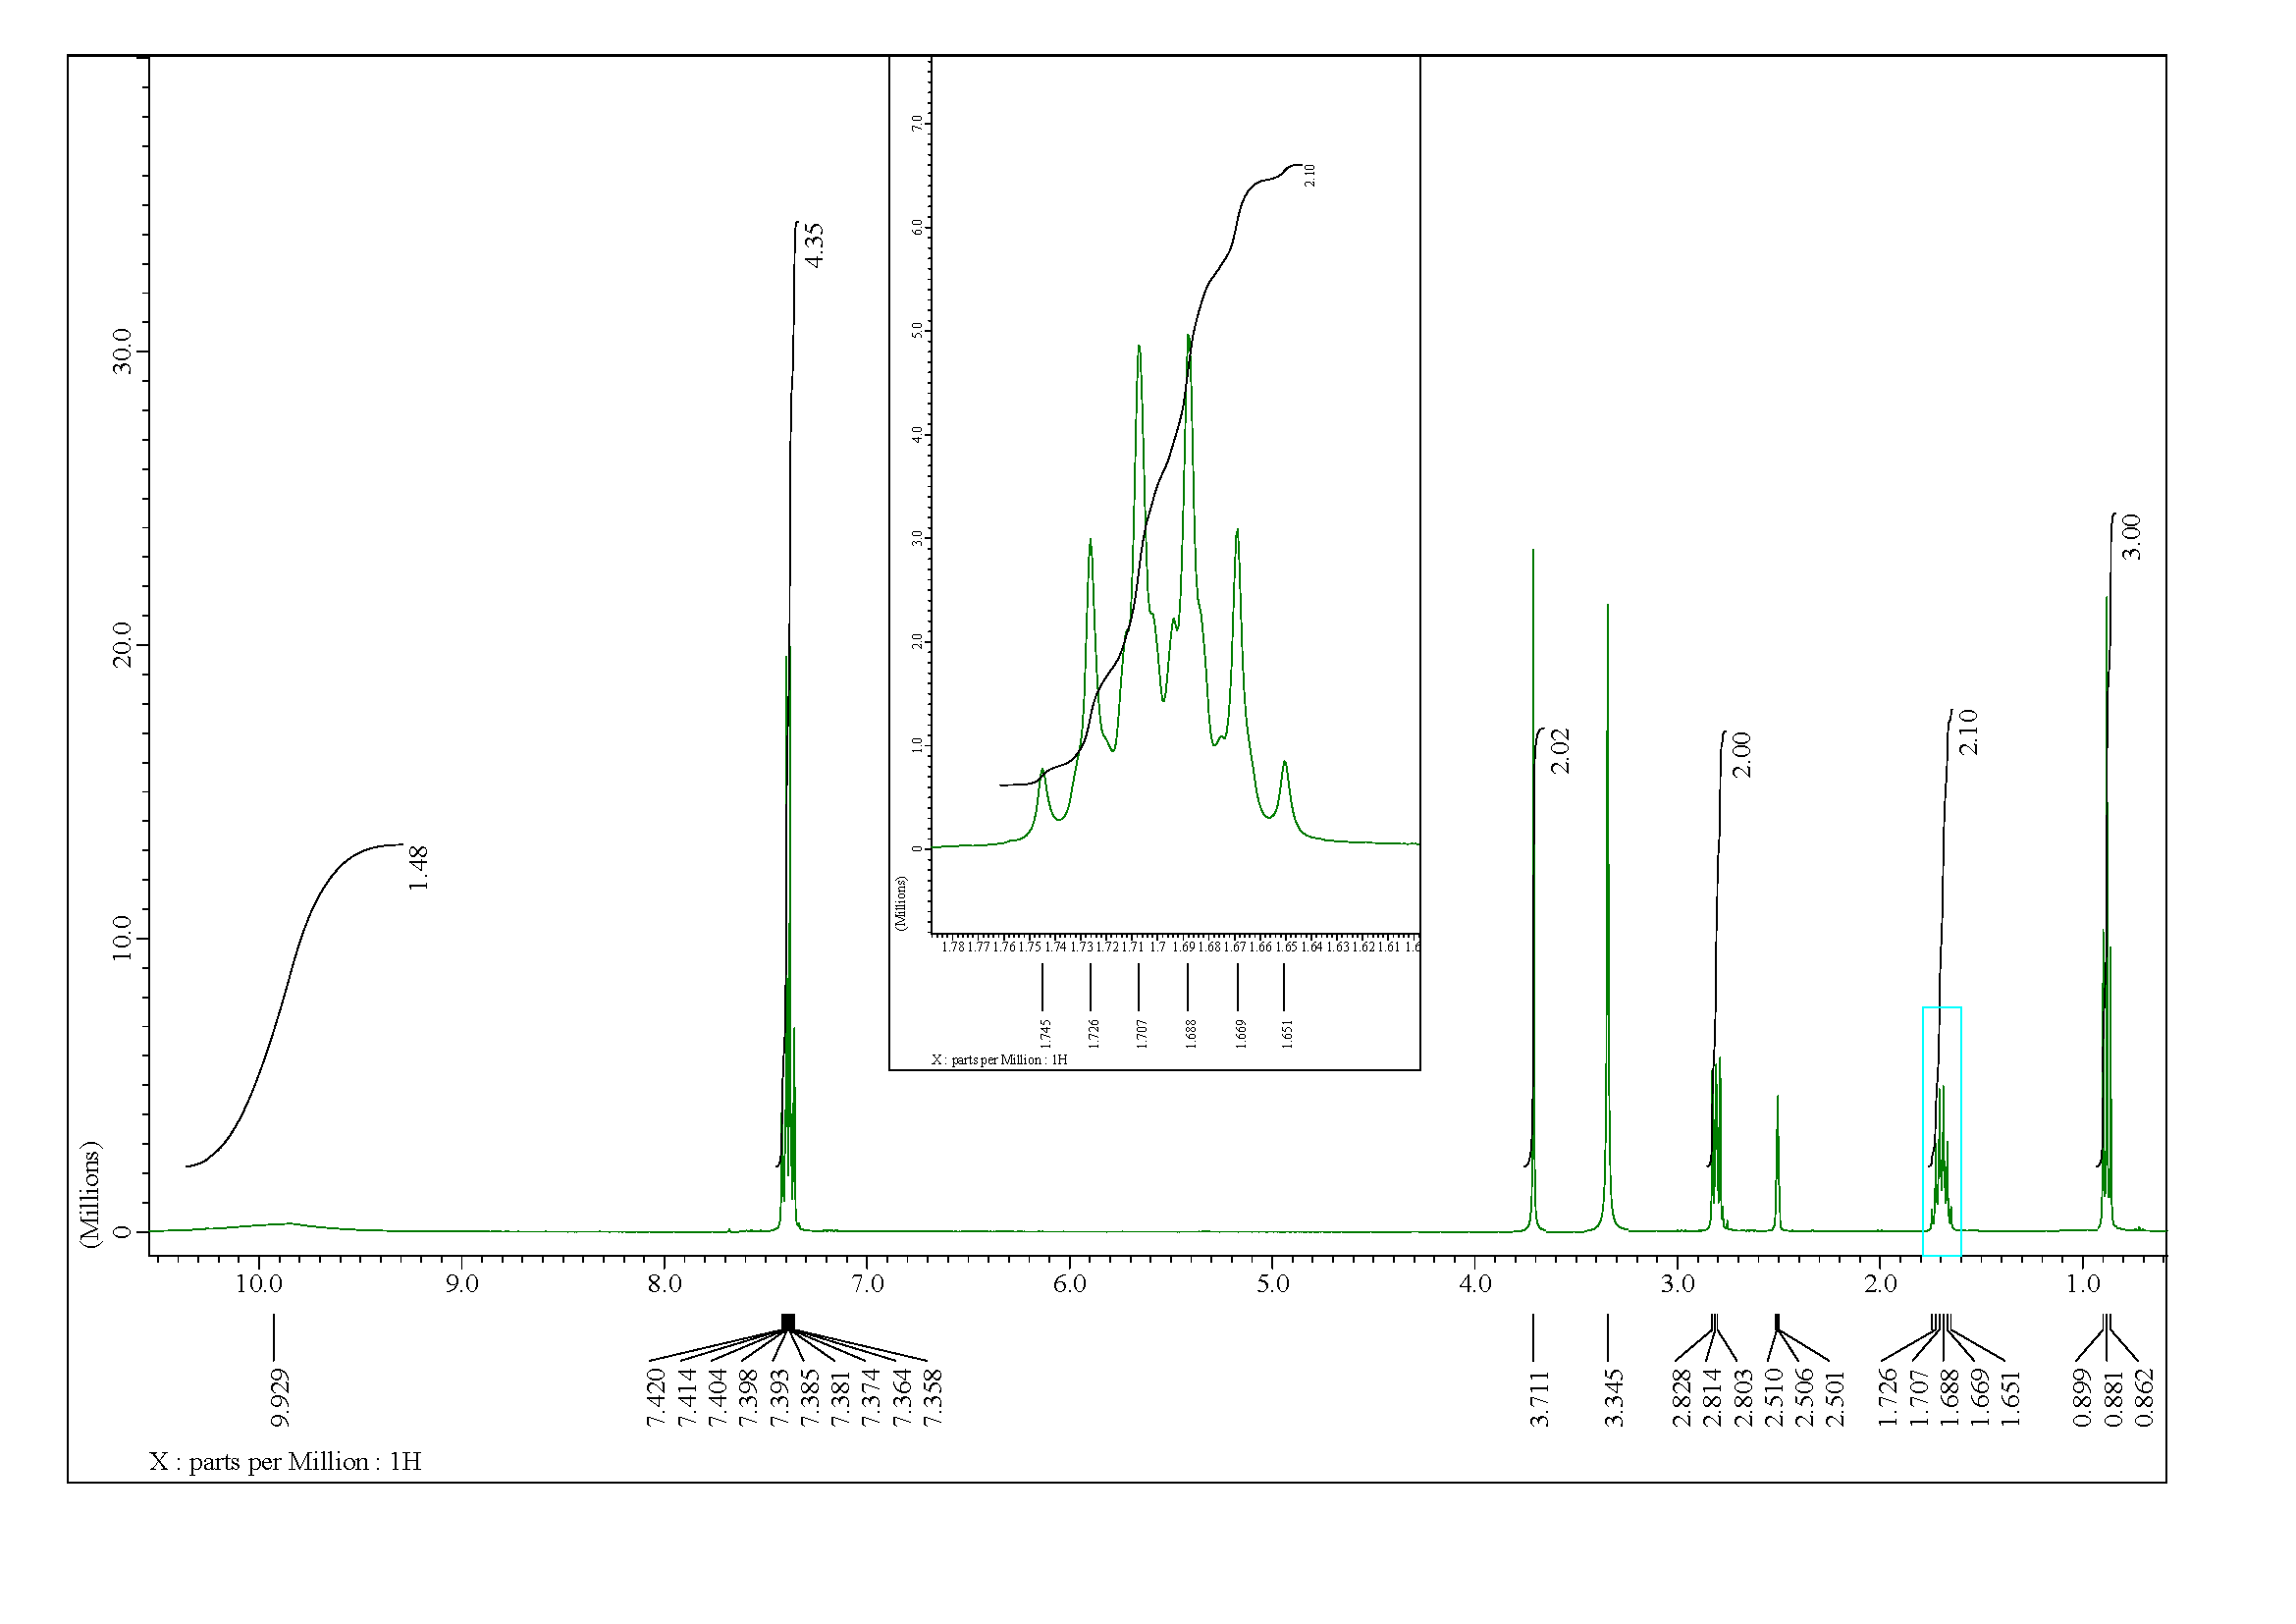


**Figure S 13.** 1H NMR of compound **4e**


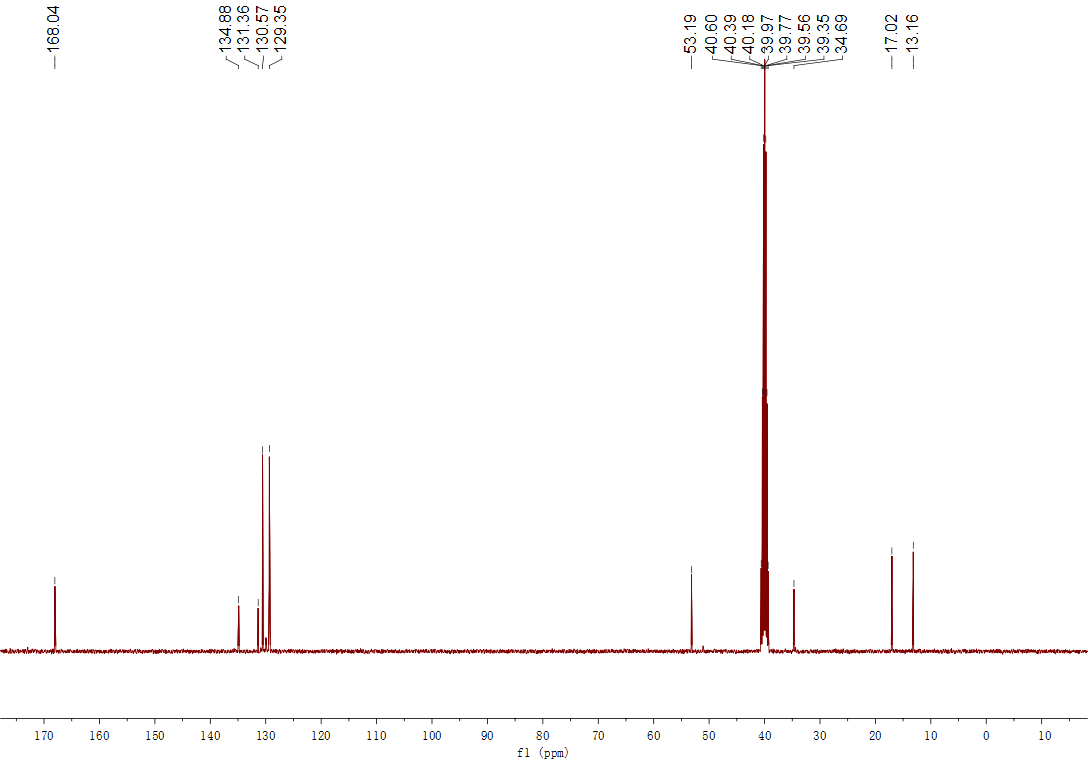


**Figure S 14.** 13C NMR of compound **4e**


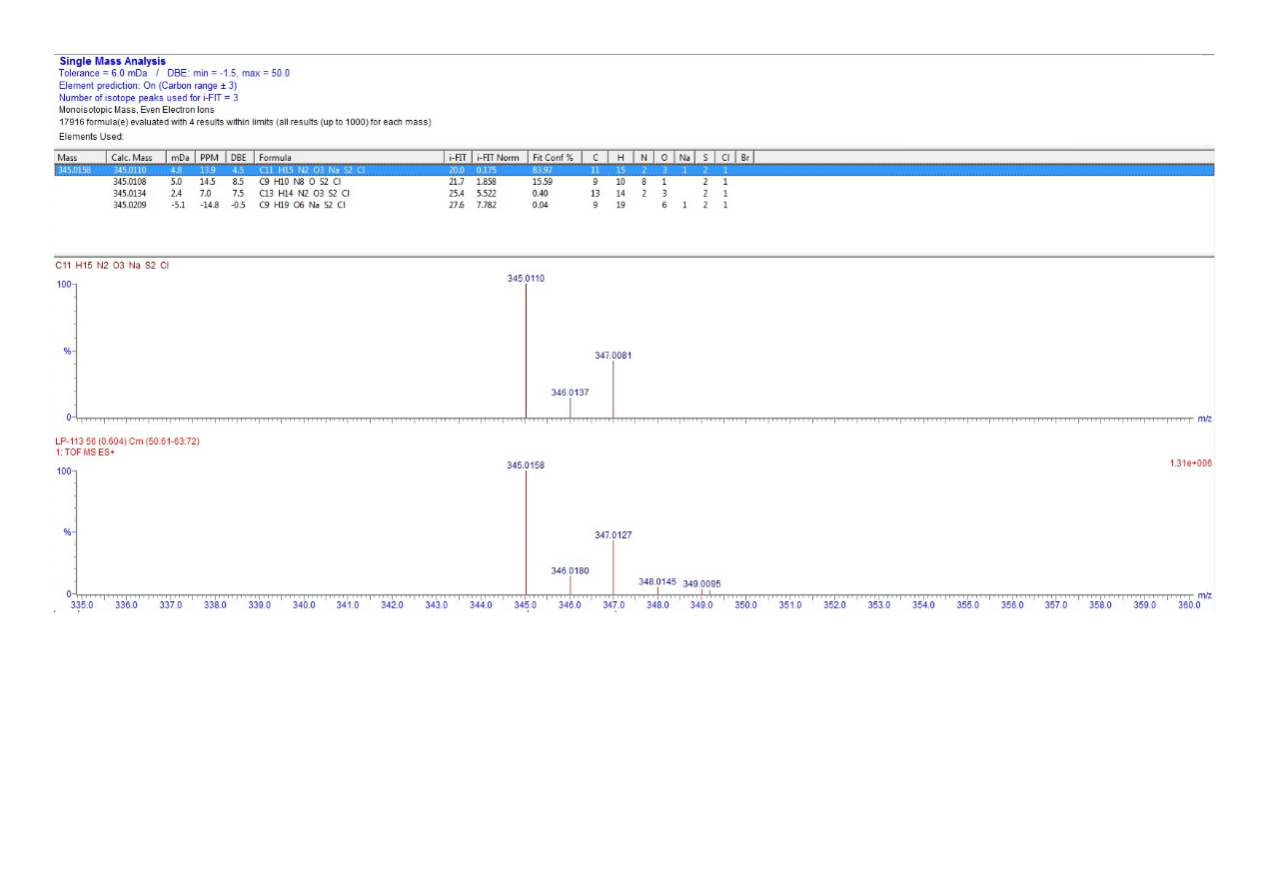


**Figure S 15.** HRMS (ESI) of compound **4­­e**


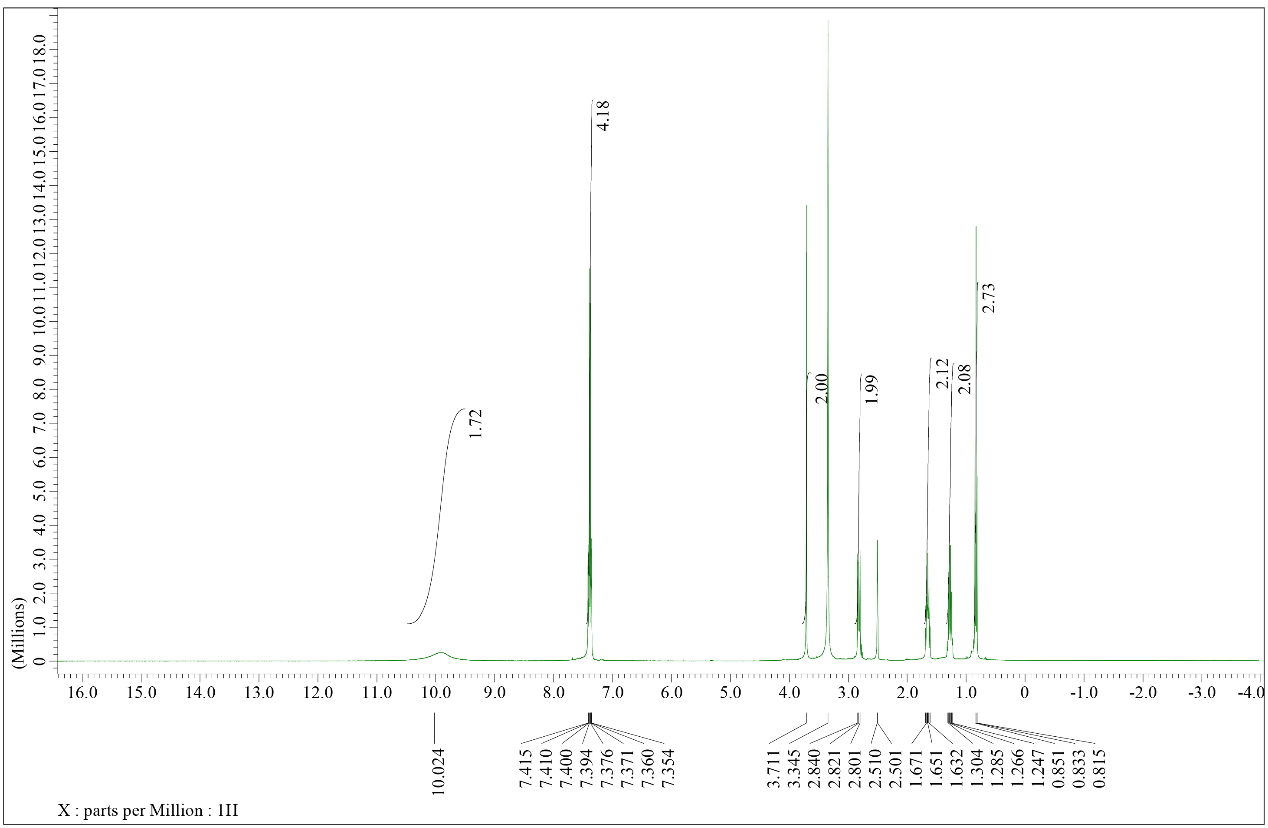


**Figure S 16.** 1H NMR of compound **4f**


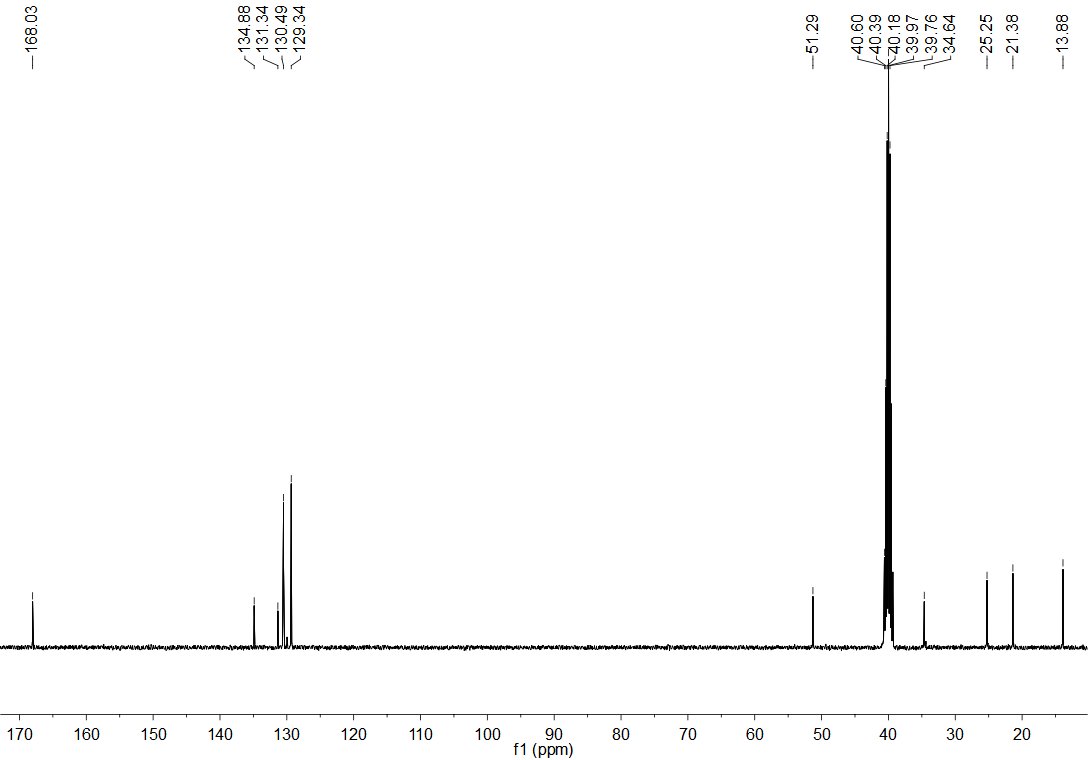


**Figure S 17.** 13C NMR of compound **4f**


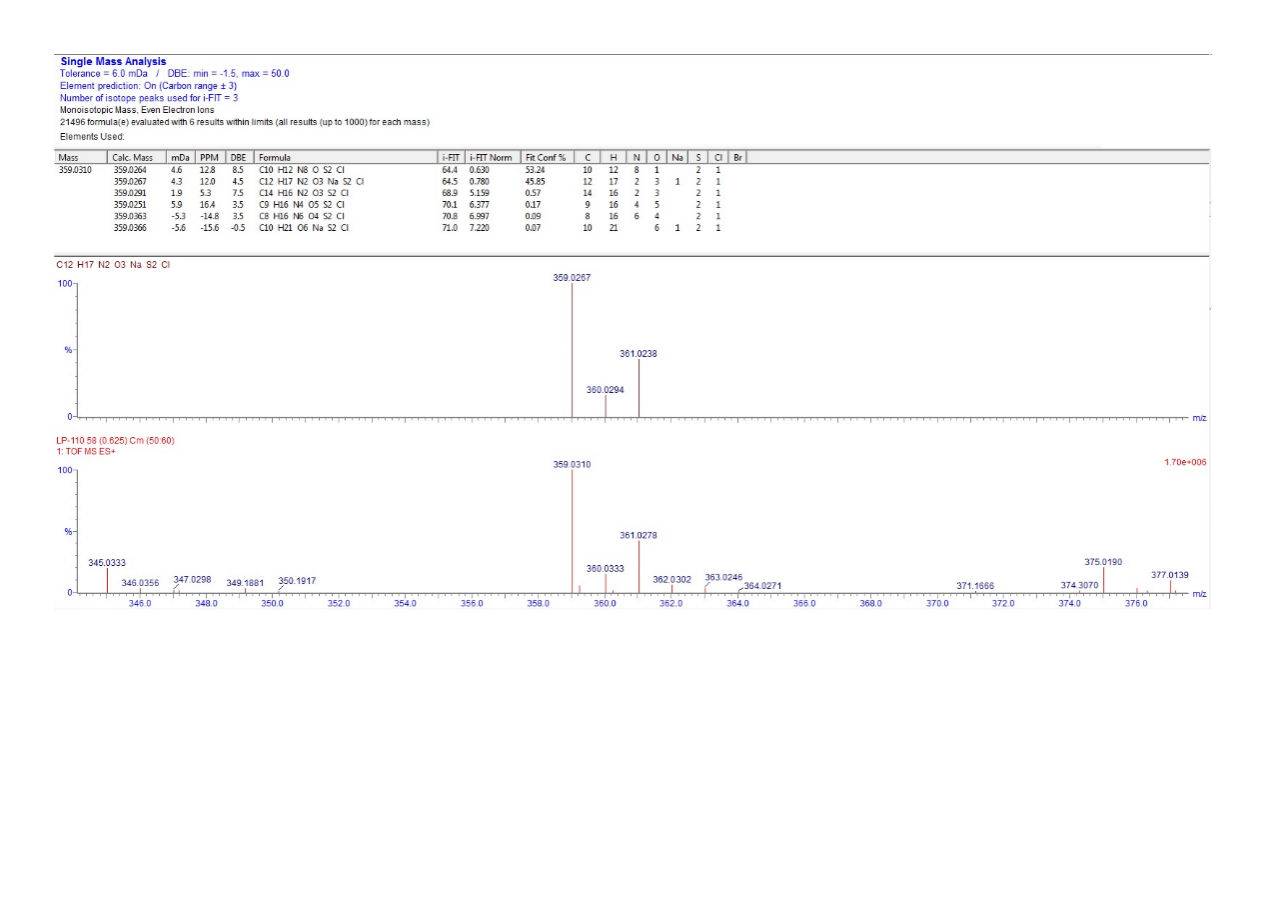


**Figure S 18.** HRMS (ESI) of compound **4­­f**


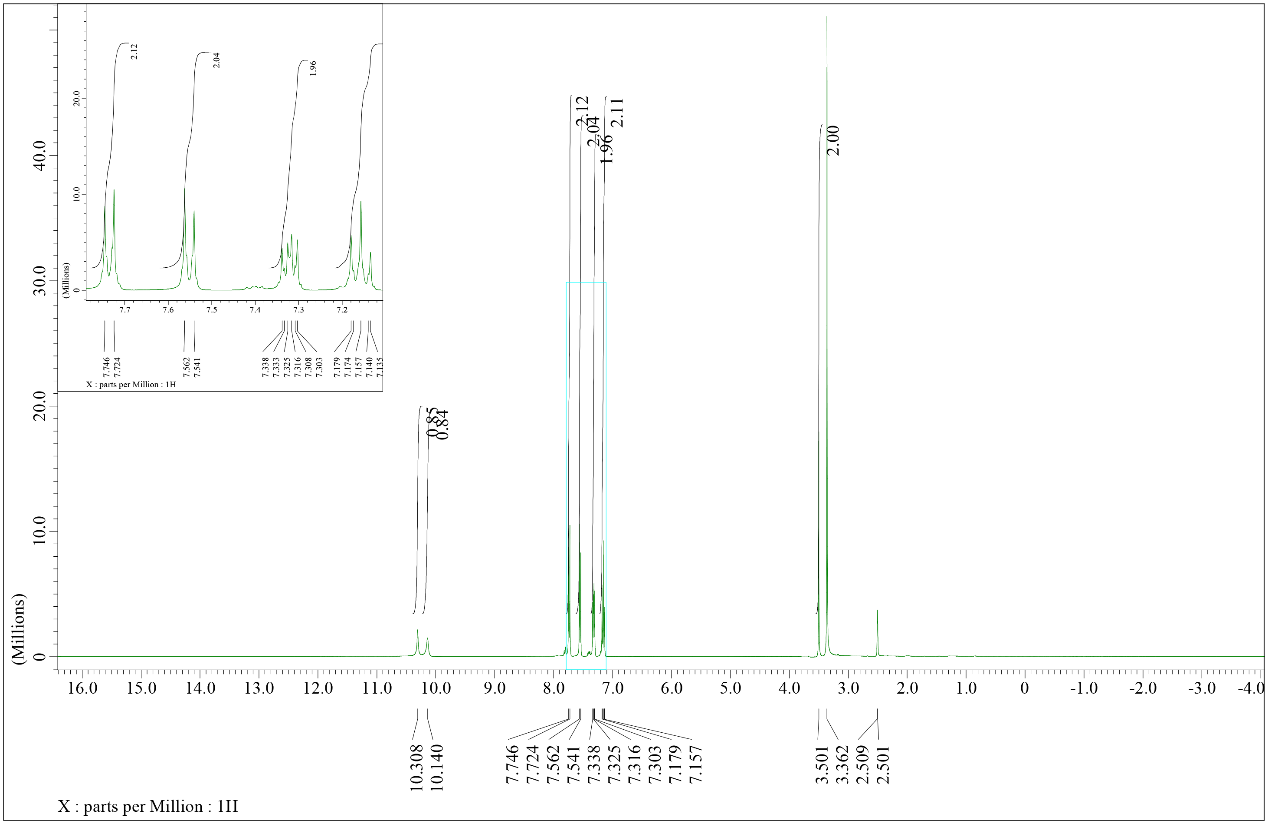


**Figure S 19.** 1H NMR of compound **4g**


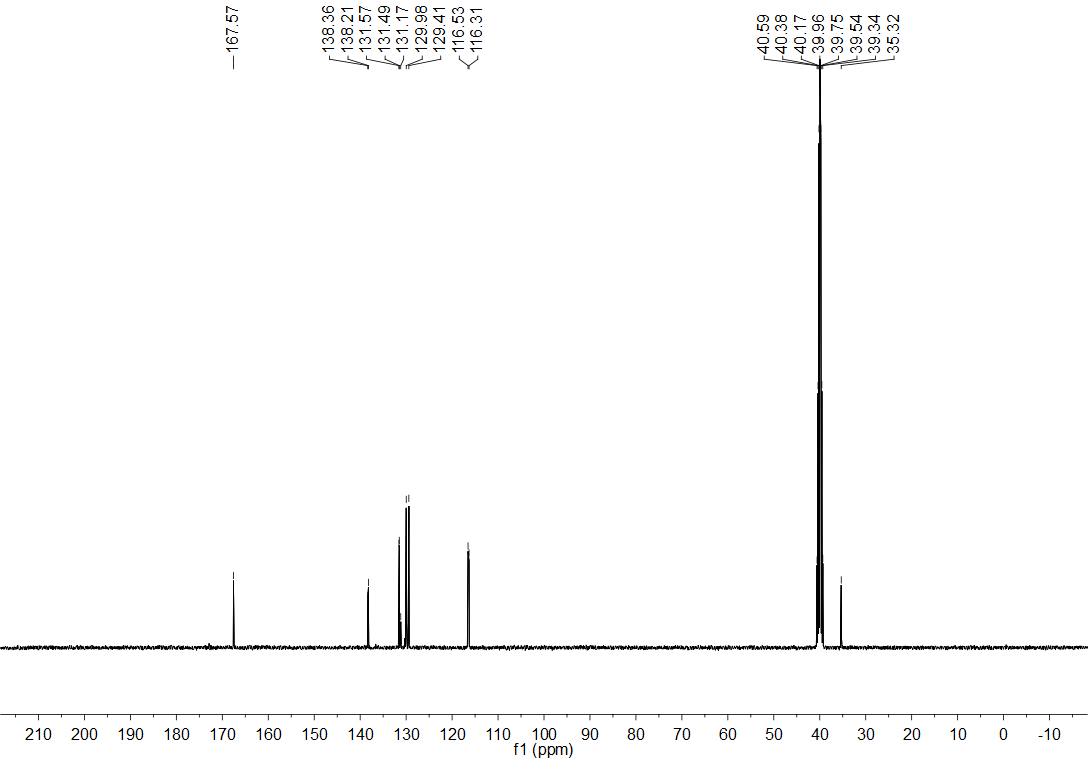


**Figure S 20.** 13C NMR of compound **4g**


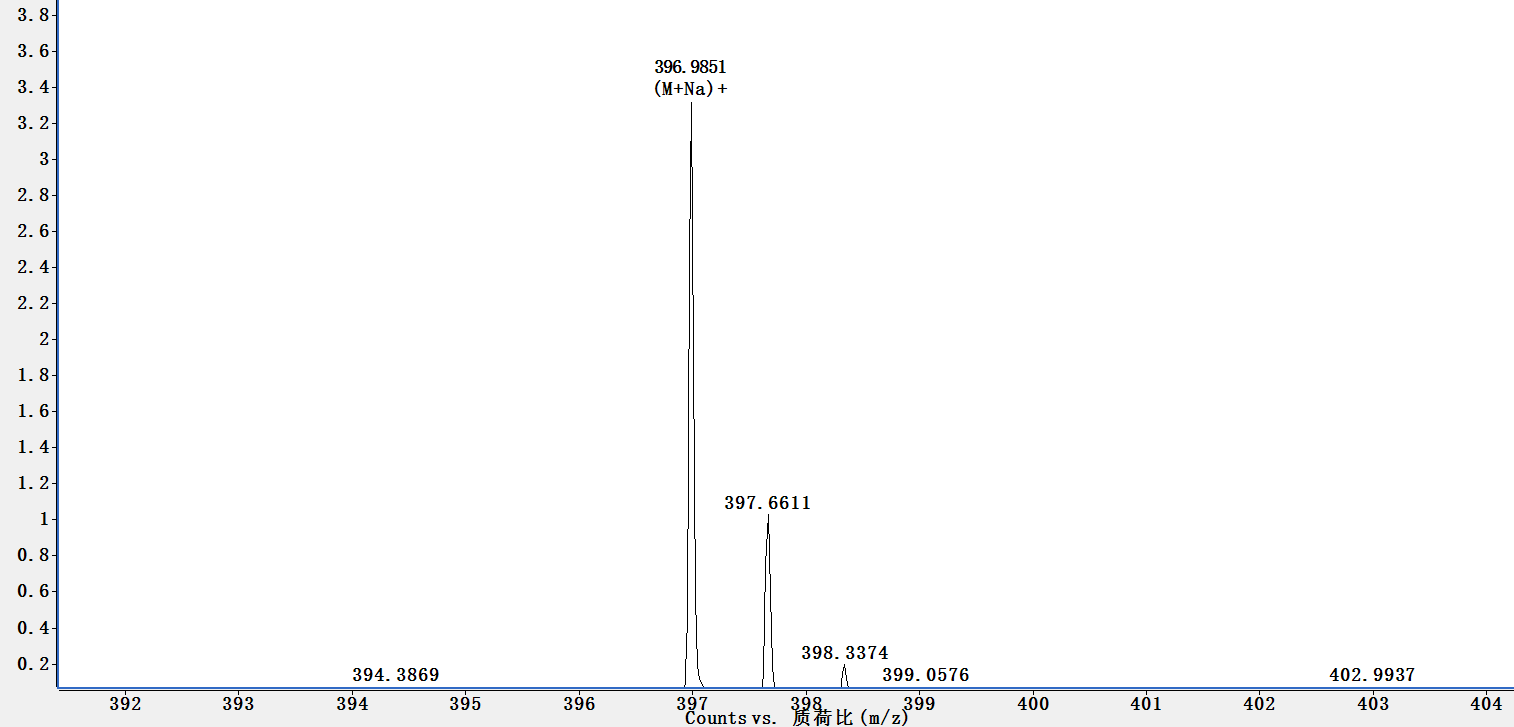


**Figure S 21.** HRMS (ESI) of compound **4­­g**


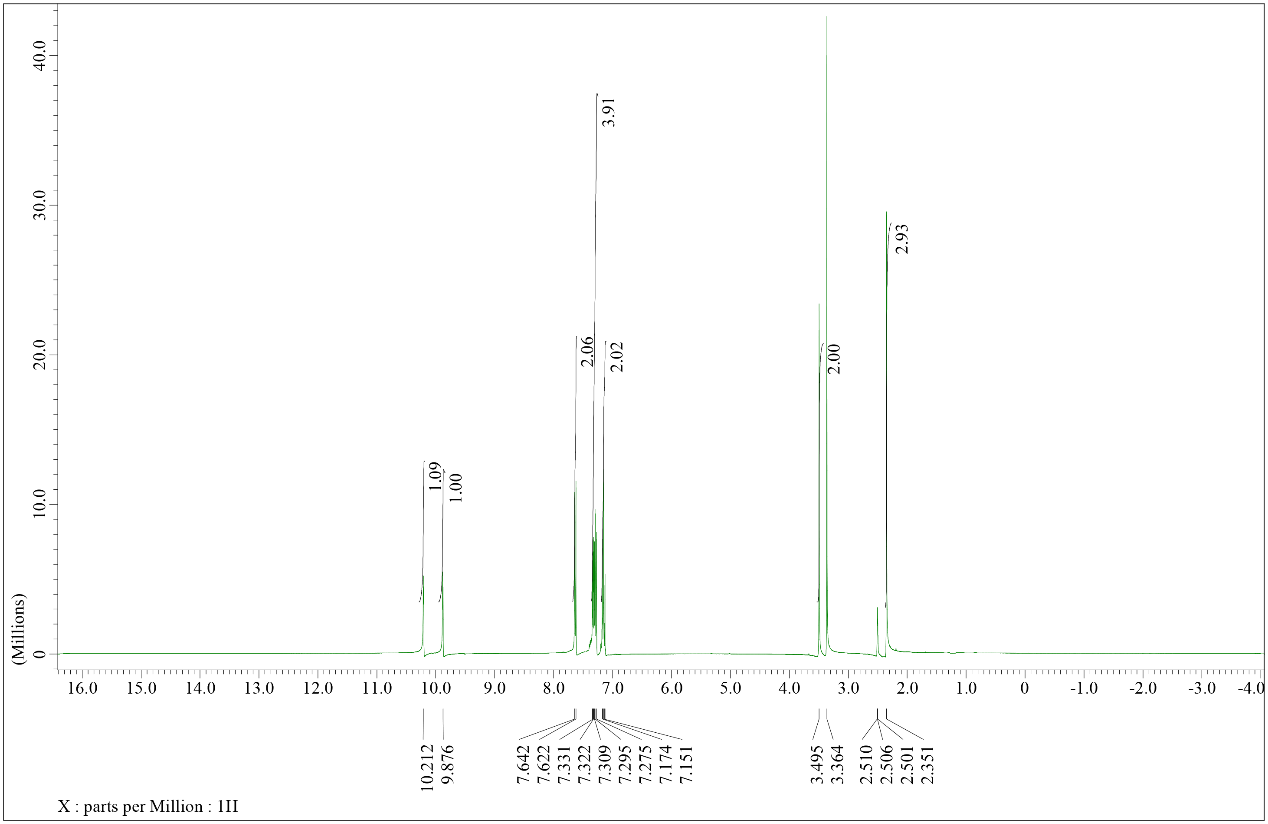


**Figure S 22.** 1H NMR of compound **4h**


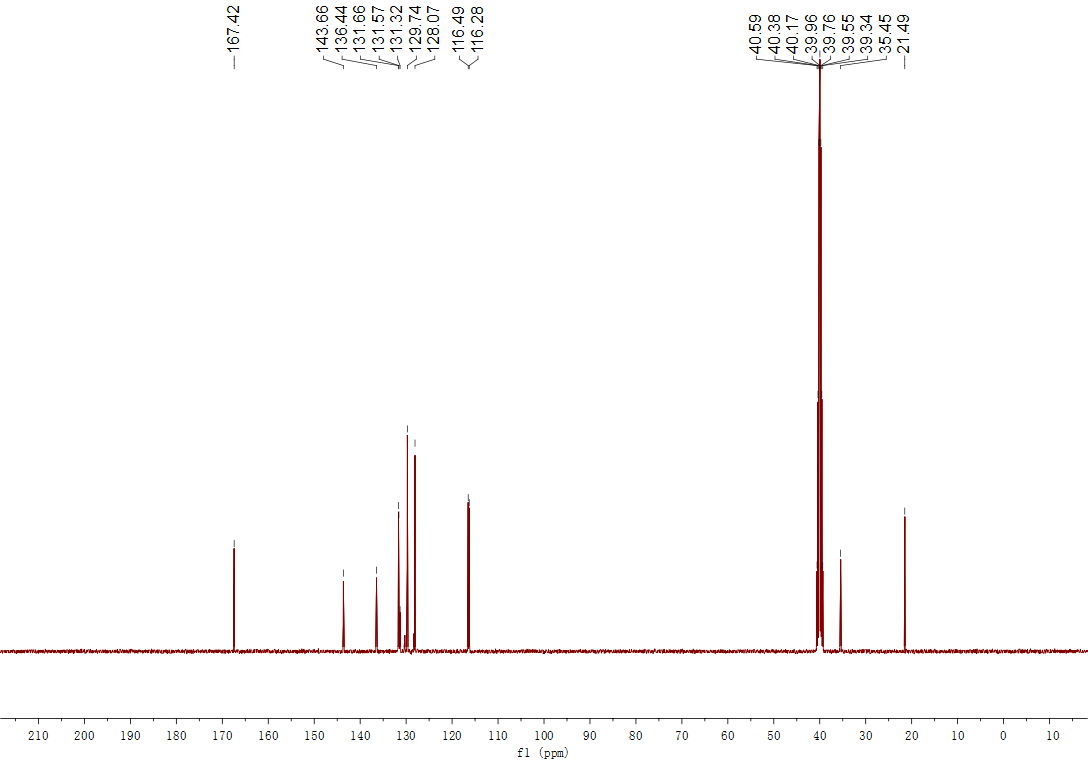


**Figure S 23.** 13C NMR of compound **4h**


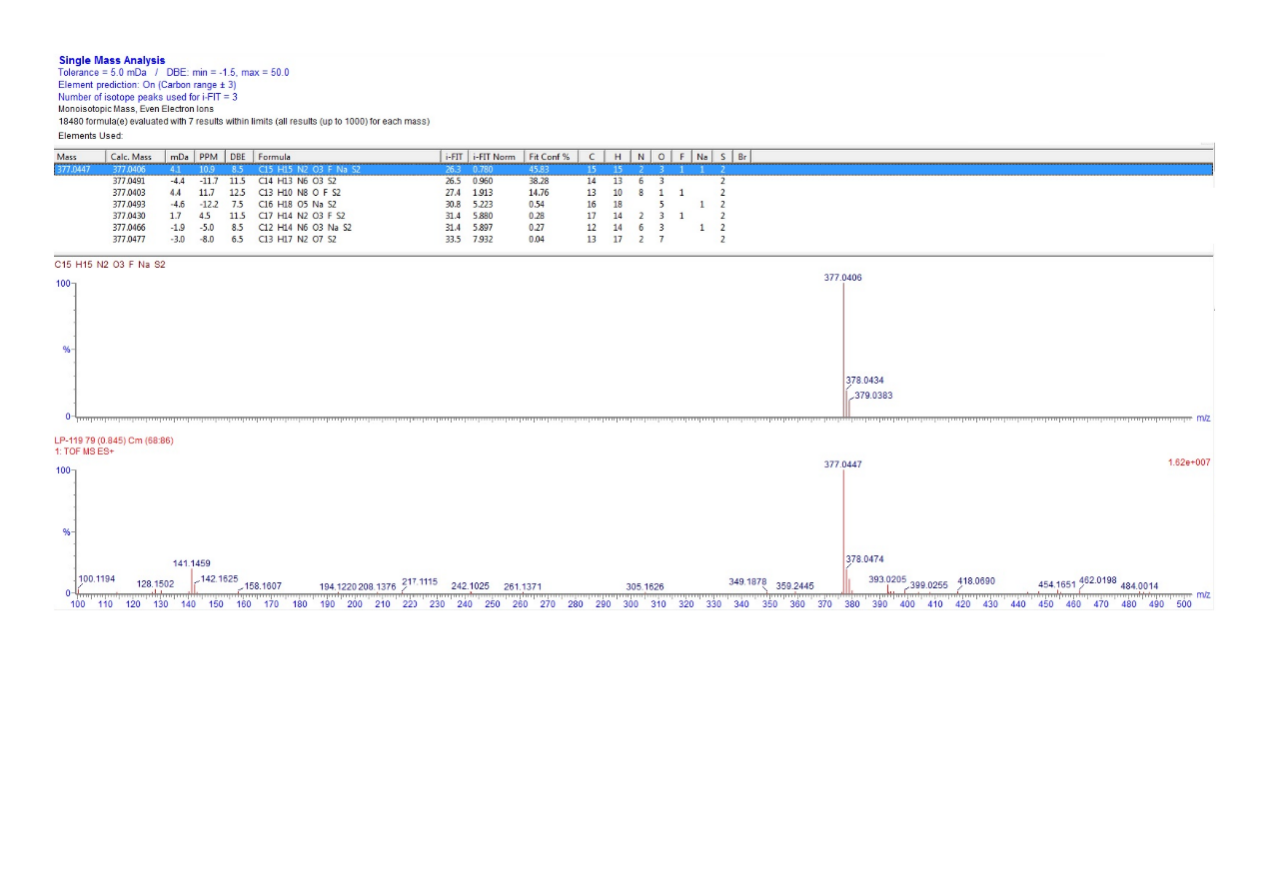


**Figure S 24.** HRMS (ESI) of compound **4­­h**


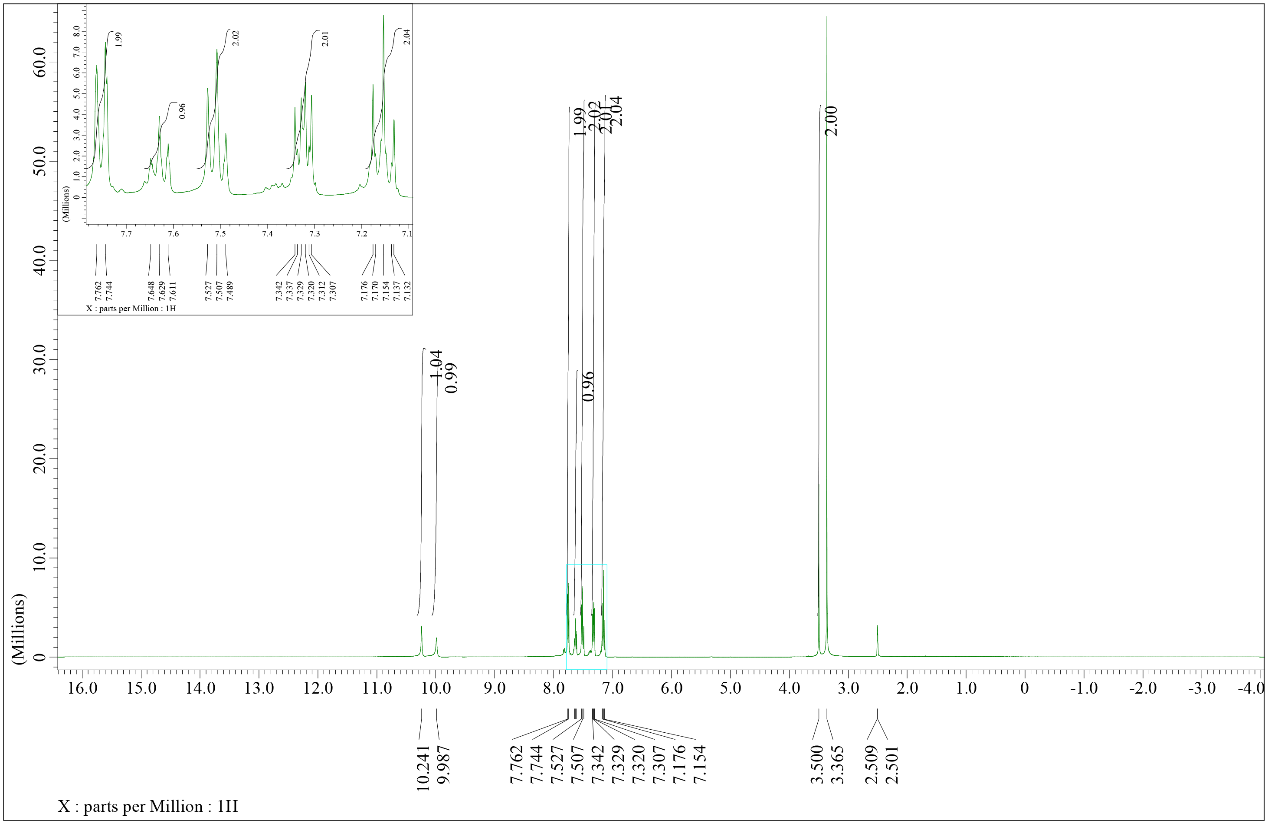


**Figure S 25.** 1H NMR of compound **4i**


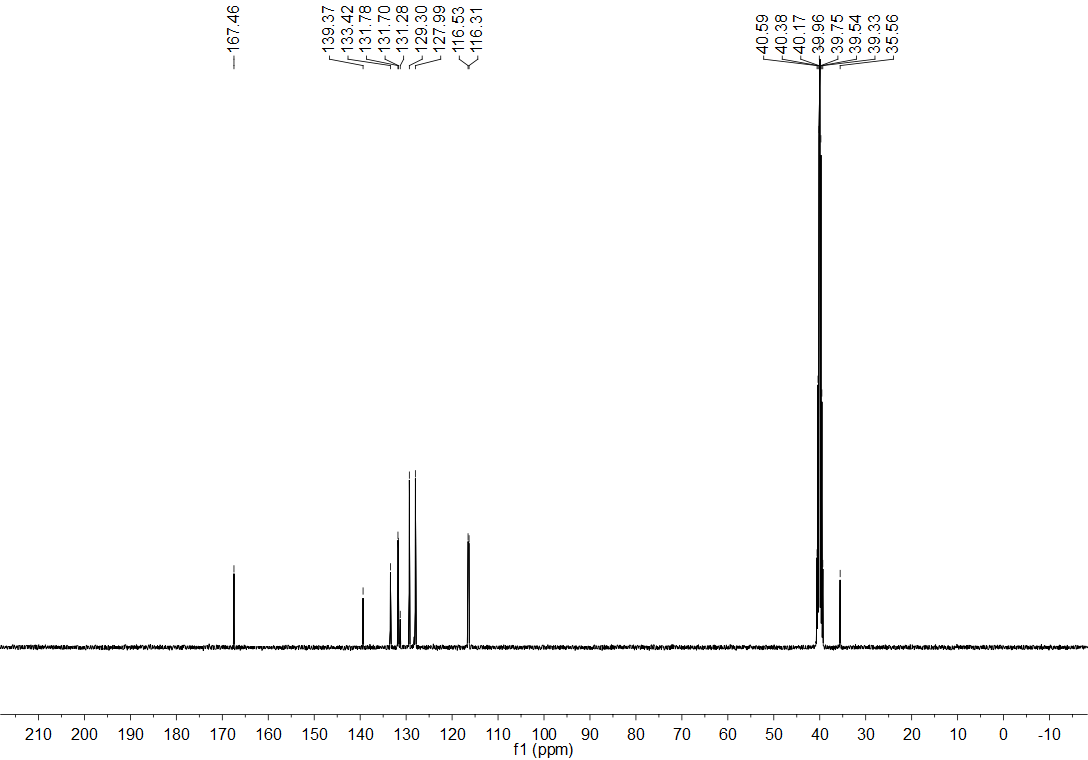


**Figure S 26.** 13C NMR of compound **4i**


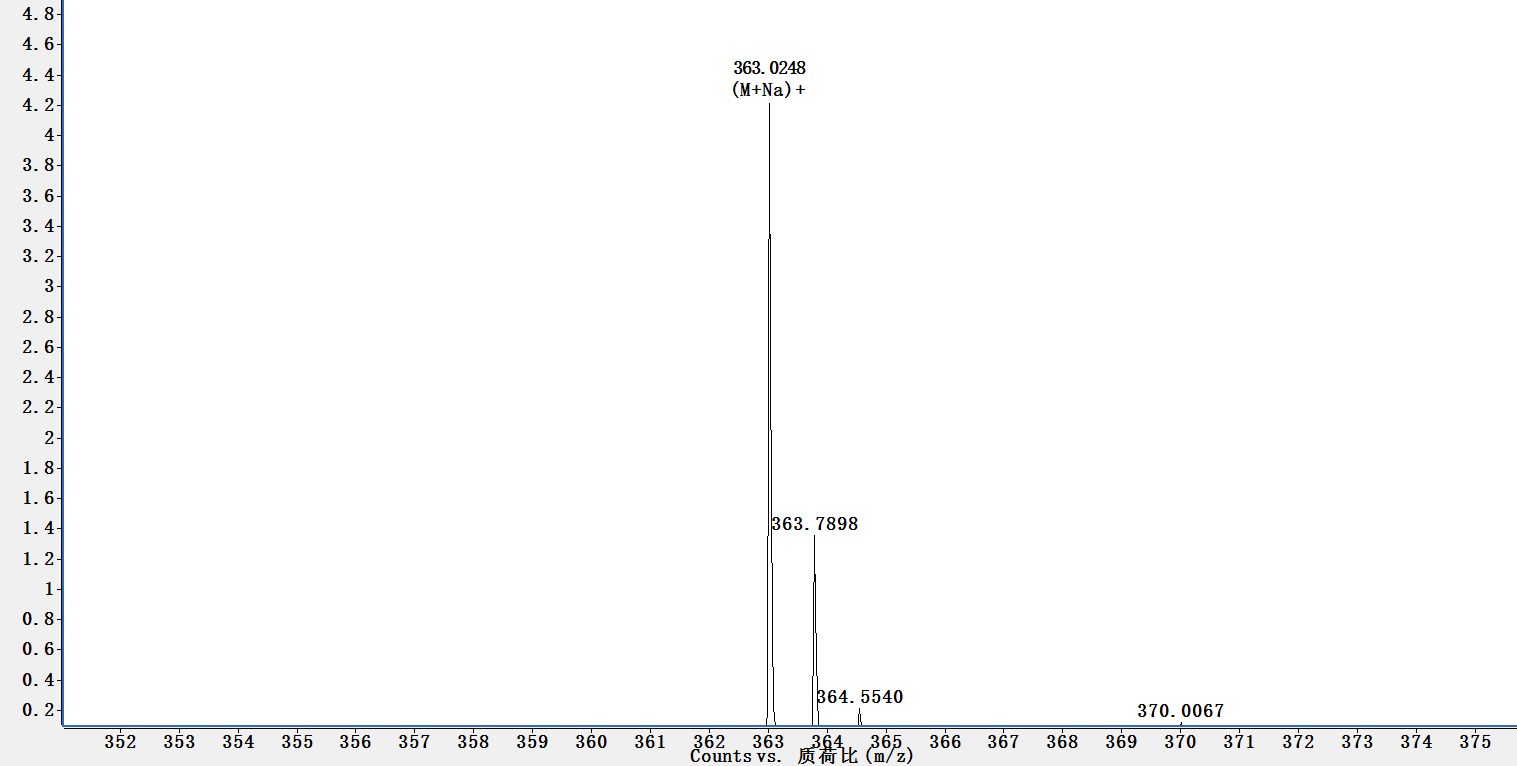


**Figure S 27.** HRMS (ESI) of compound **4­­i**


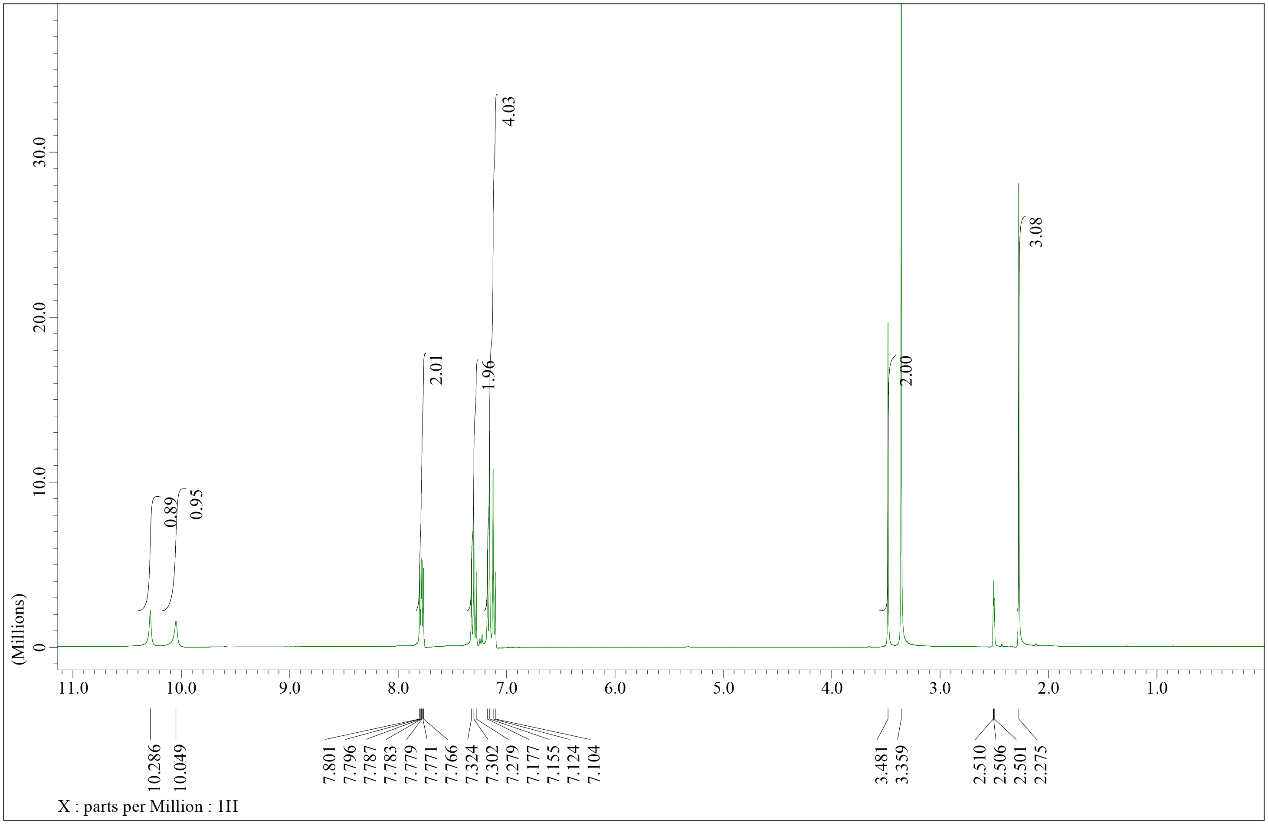


**Figure S 28.** 1H NMR of compound **4j**


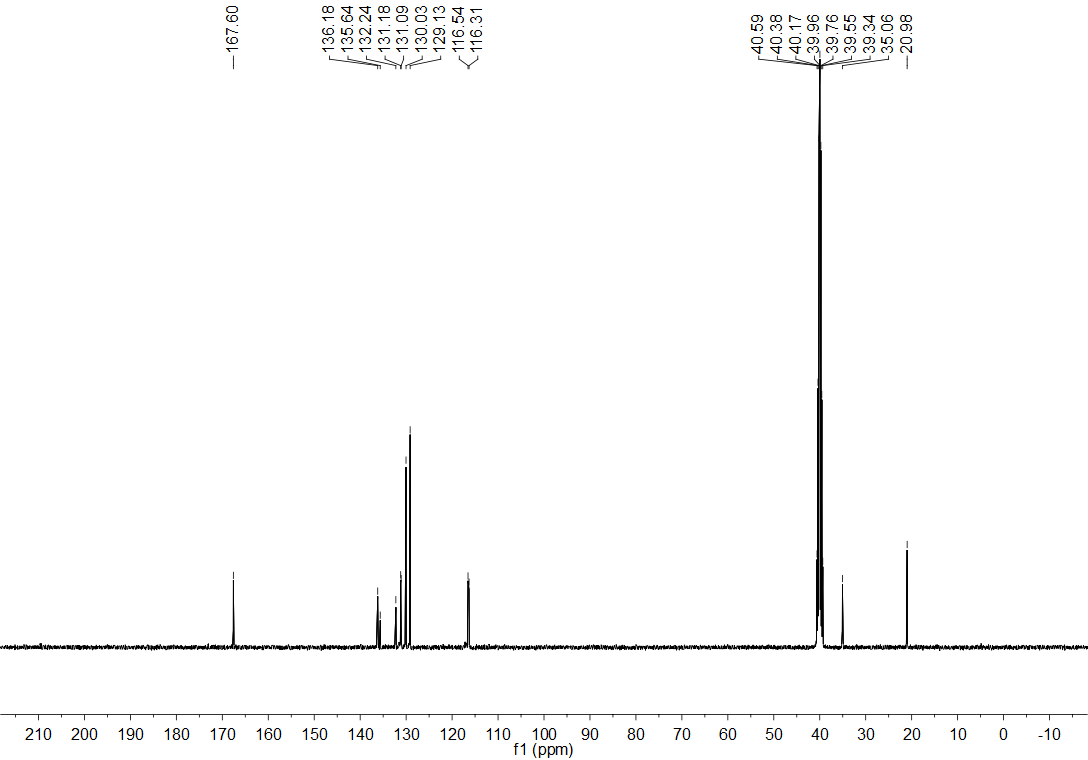


**Figure S 29.** 13C NMR of compound **4j**


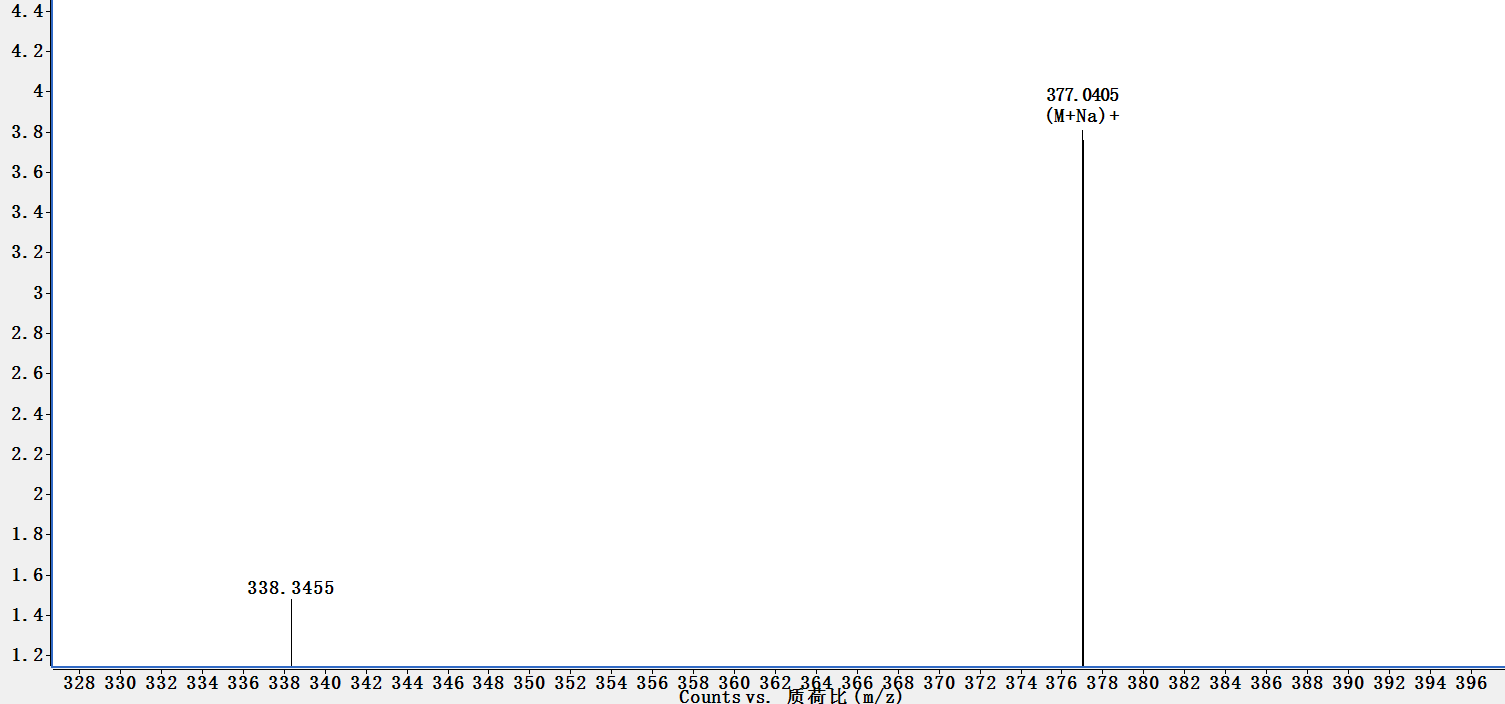


**Figure S 30.** HRMS (ESI) of compound **4­­j**


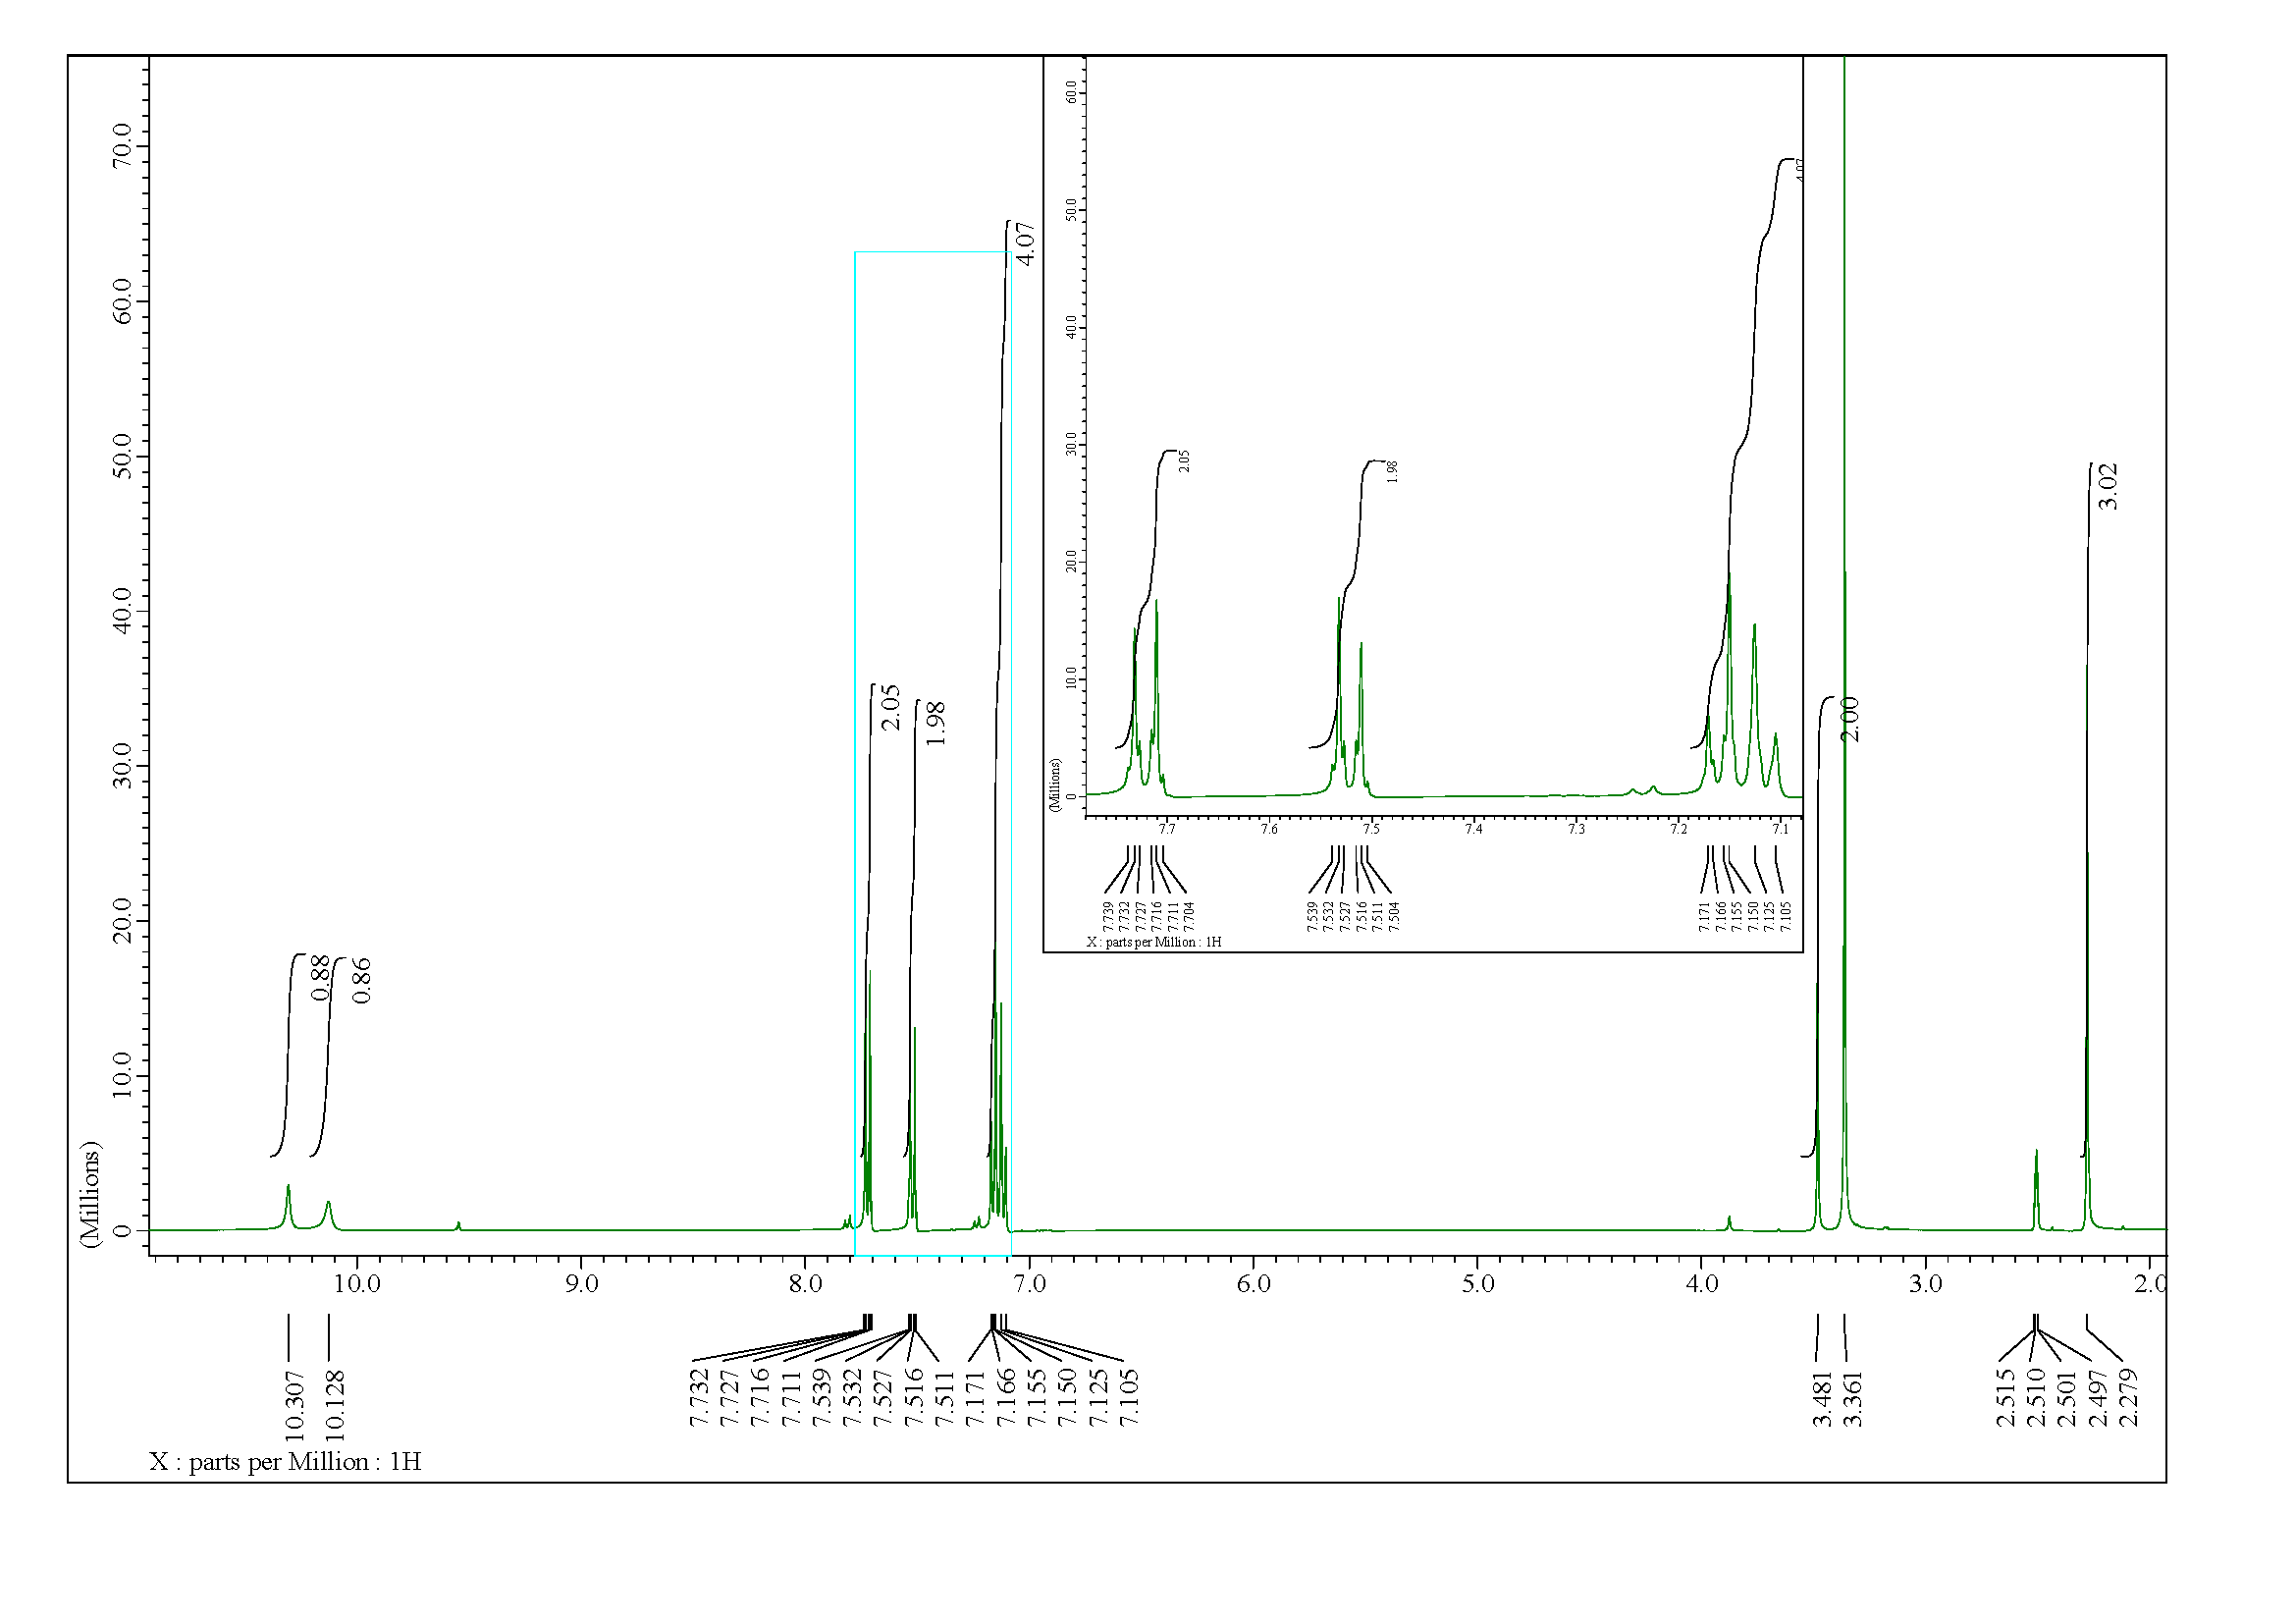


**Figure S 31.** 1H NMR of compound **4k**


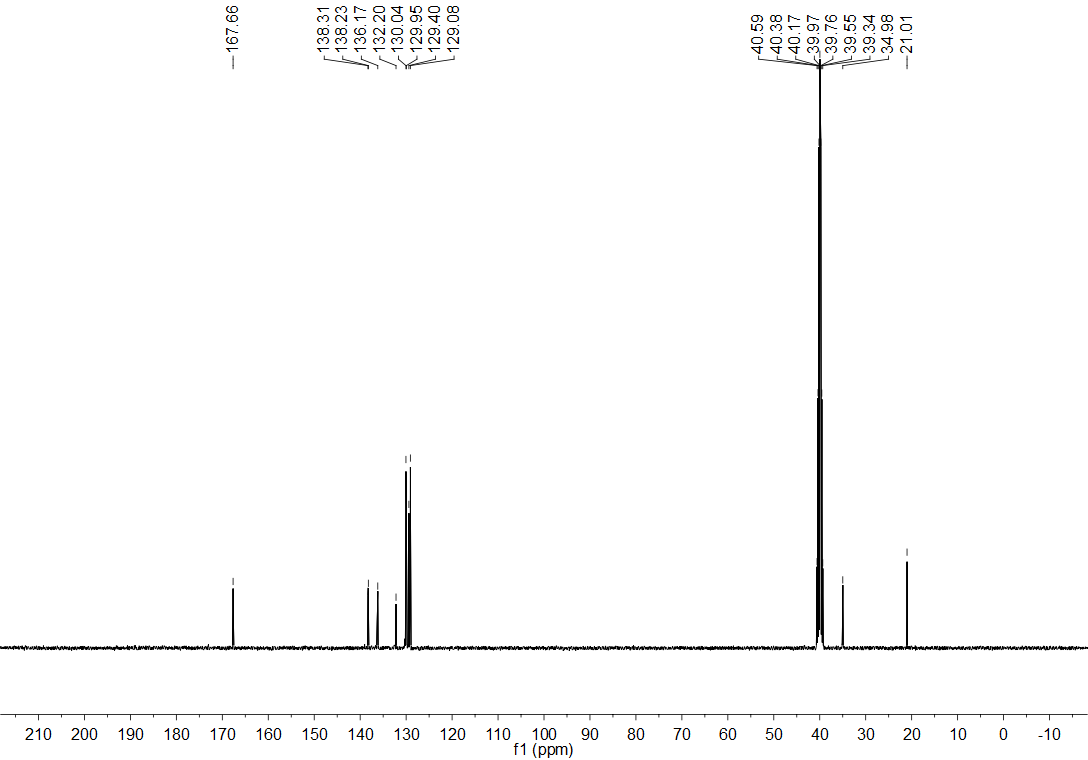


**Figure S 32.** 13C NMR of compound **4k**


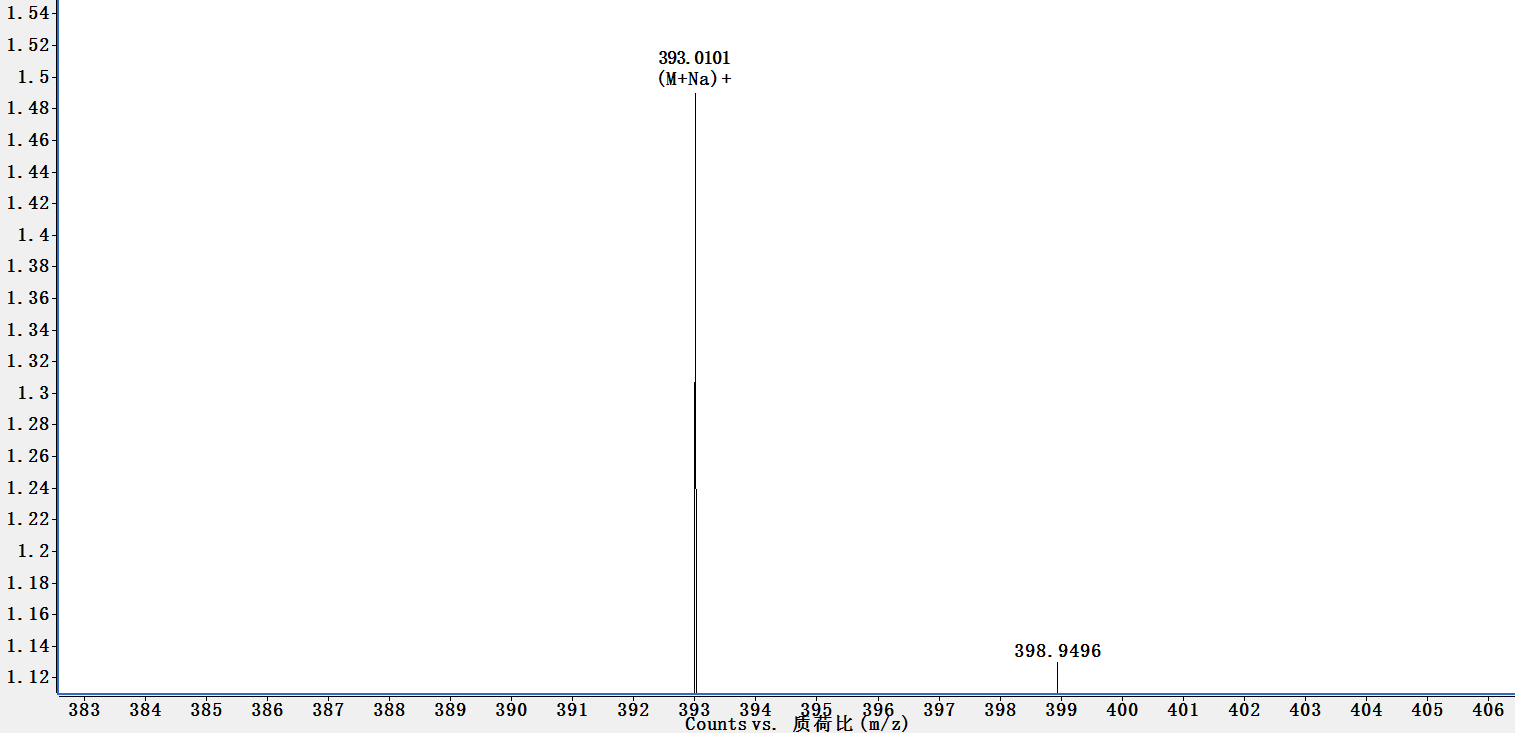


**Figure S 33.** HRMS (ESI) of compound **4­­k**


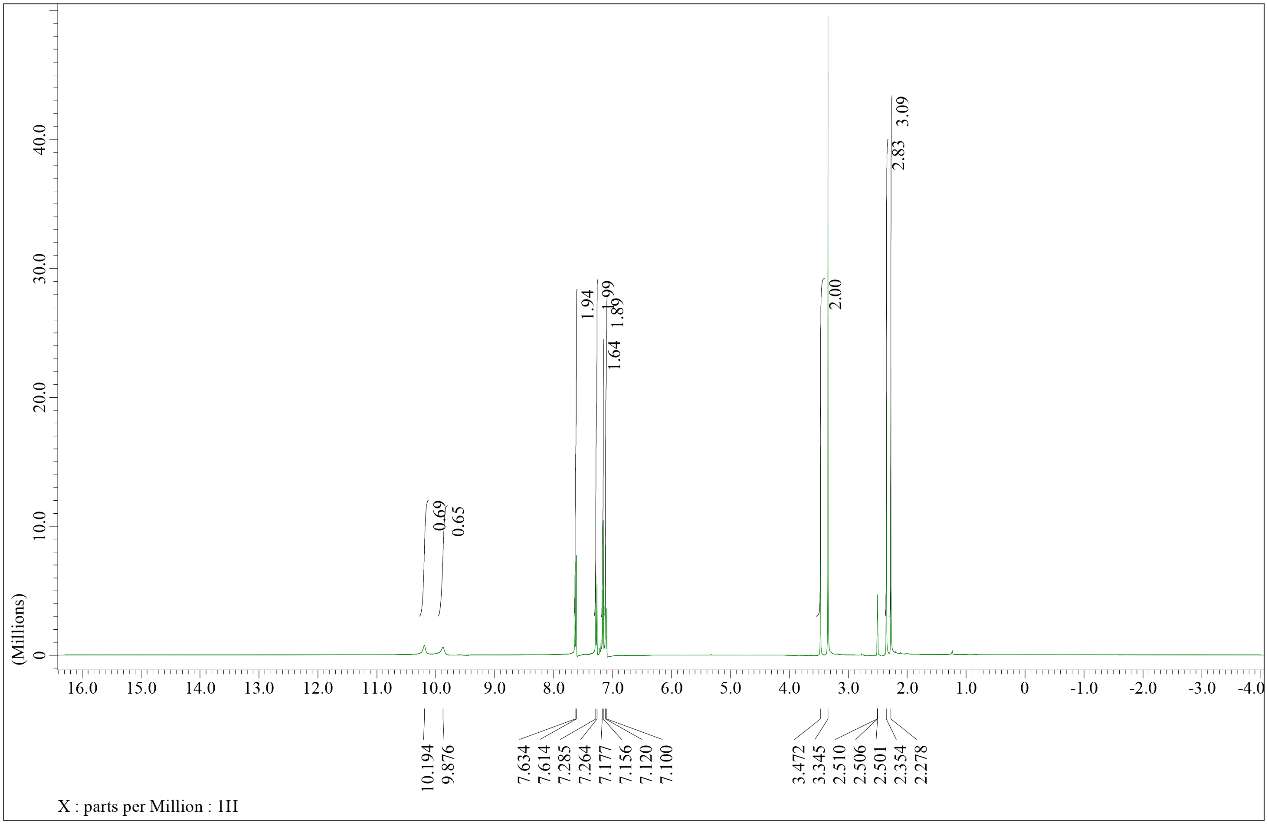


**Figure S 34.** 1H NMR of compound **4l**


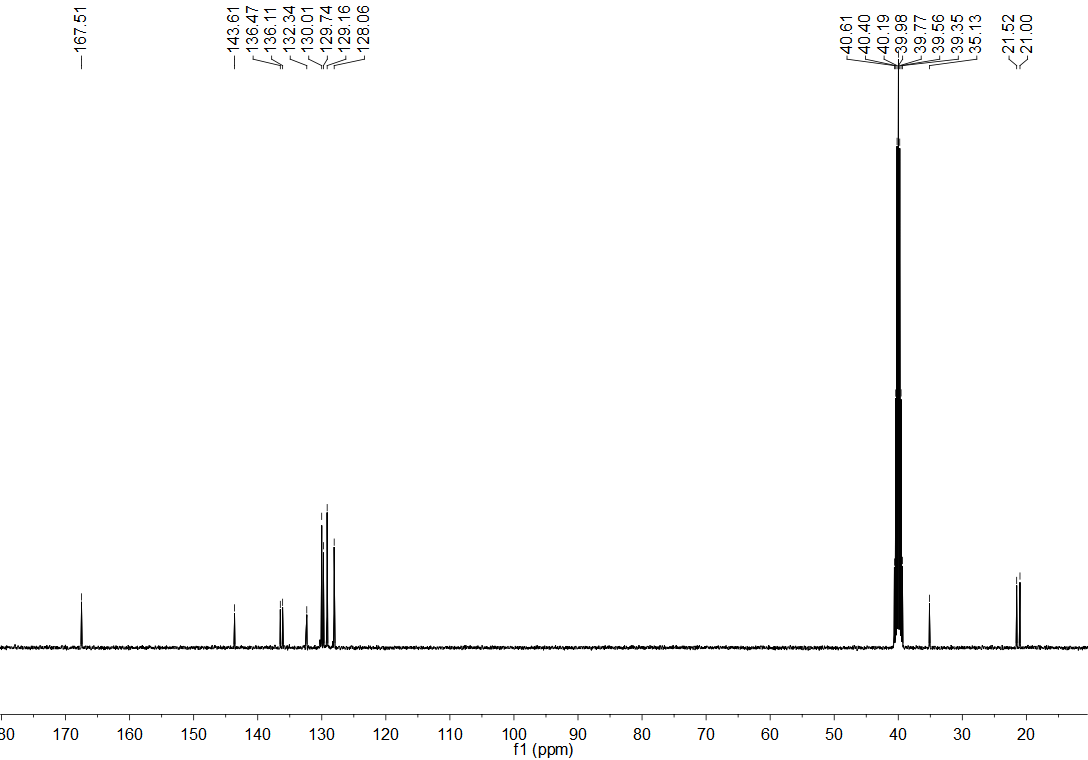


**Figure S 35.** 13C NMR of compound **4l**


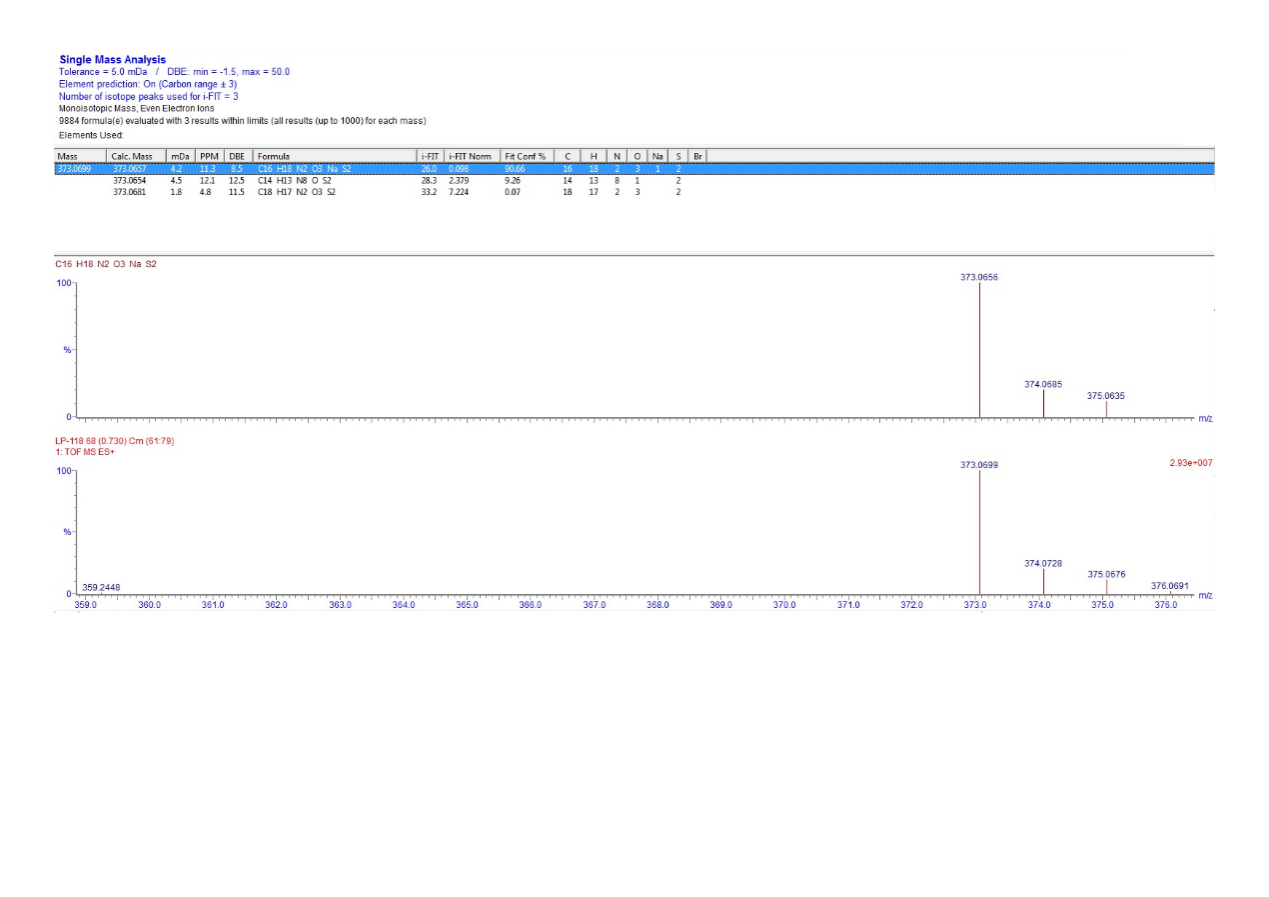


**Figure S 36.** HRMS (ESI) of compound **4­­l**


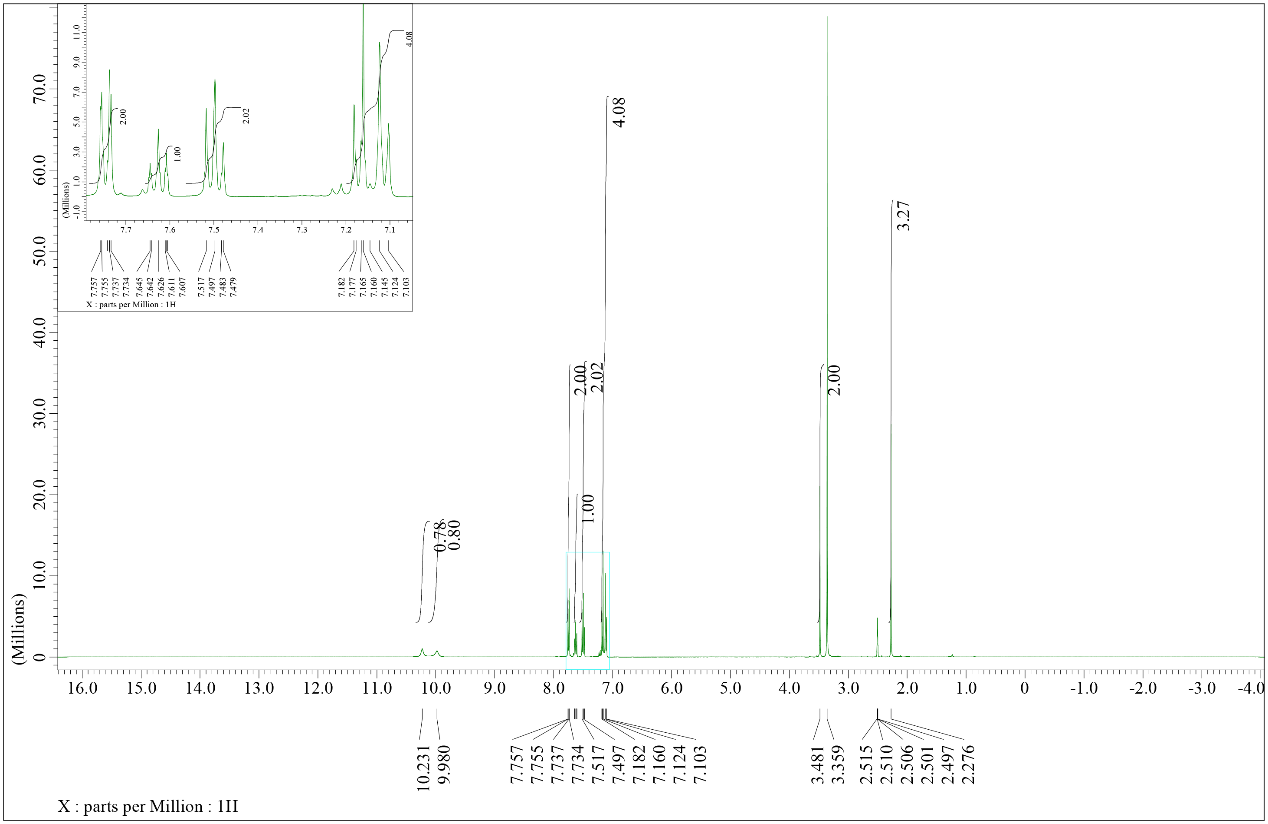


**Figure S 37.** 1H NMR of compound **4m**


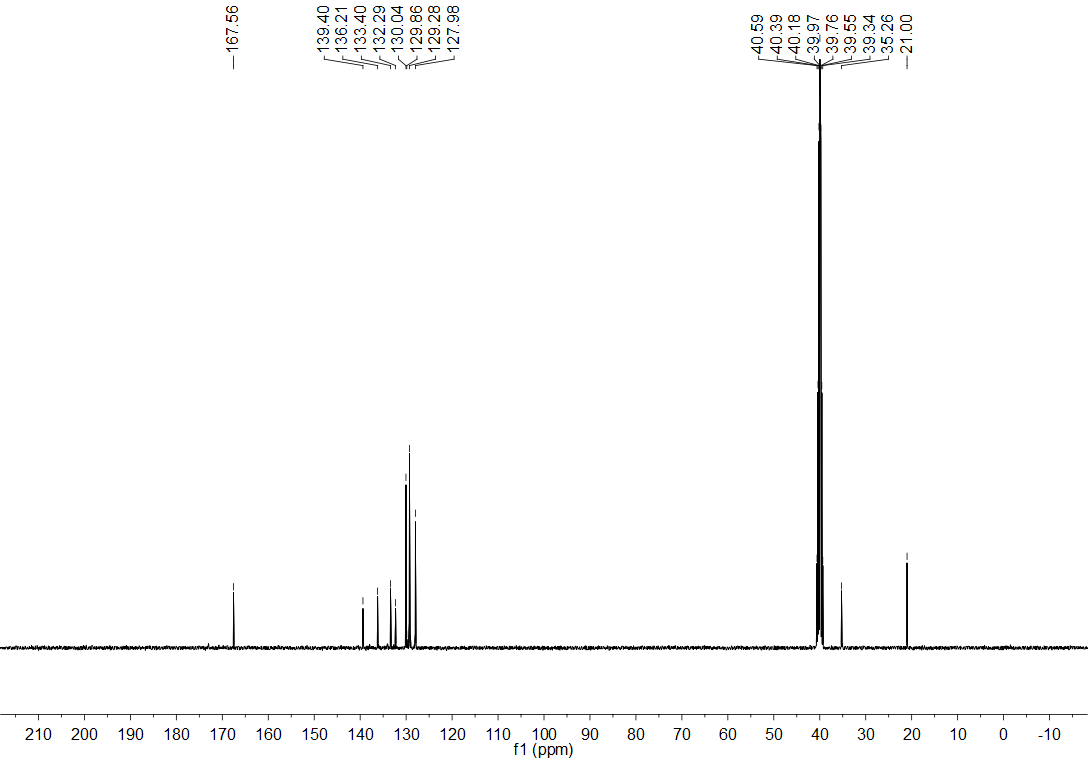


**Figure S 38.** 13C NMR of compound **4m**


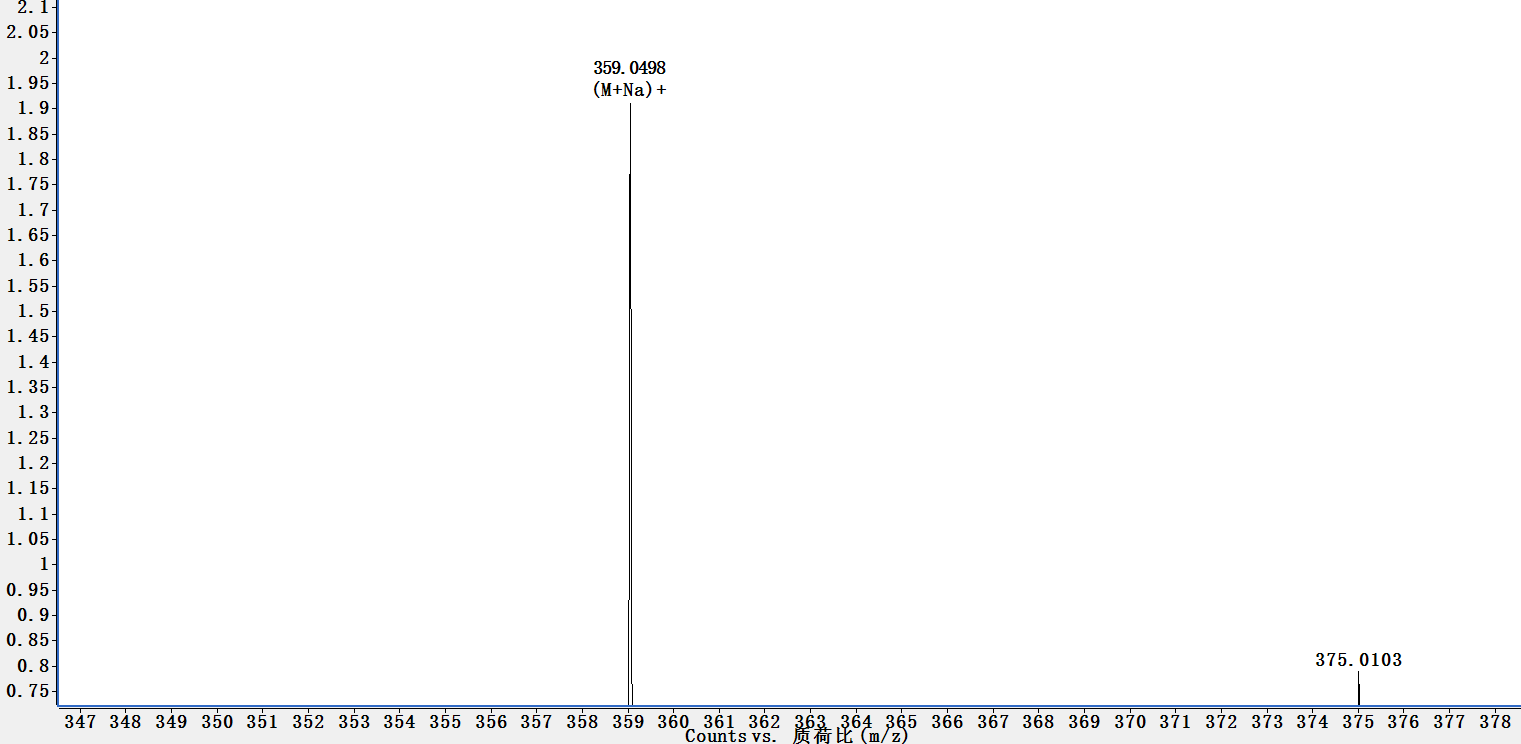


**Figure S 39.** HRMS (ESI) of compound **4­­m**


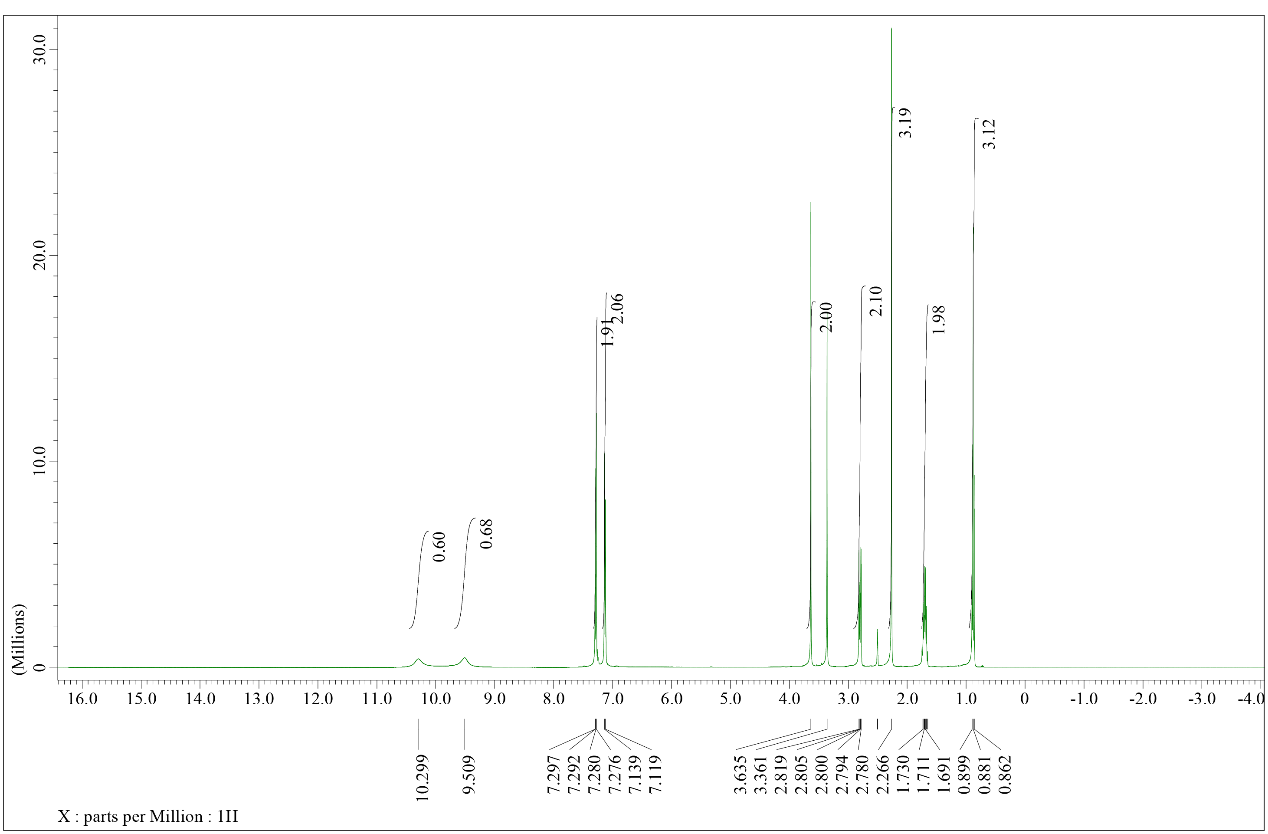


**Figure S 40.** 1H NMR of compound **4n**


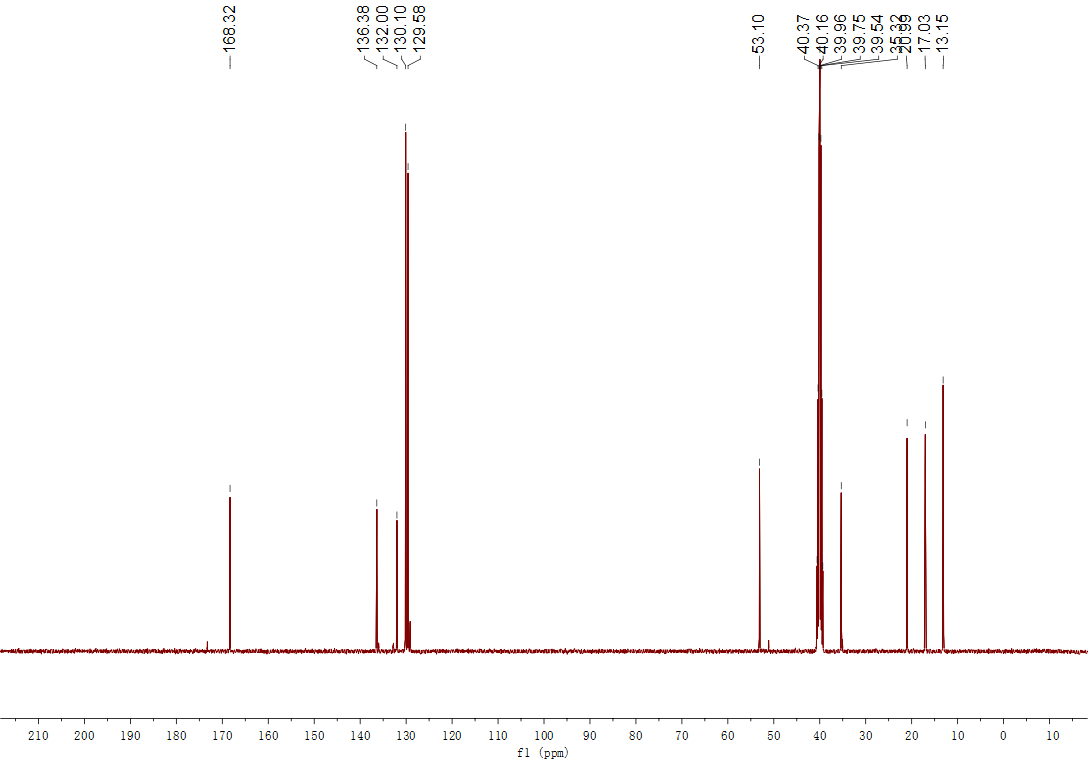


**Figure S 41.** 13C NMR of compound **4n**


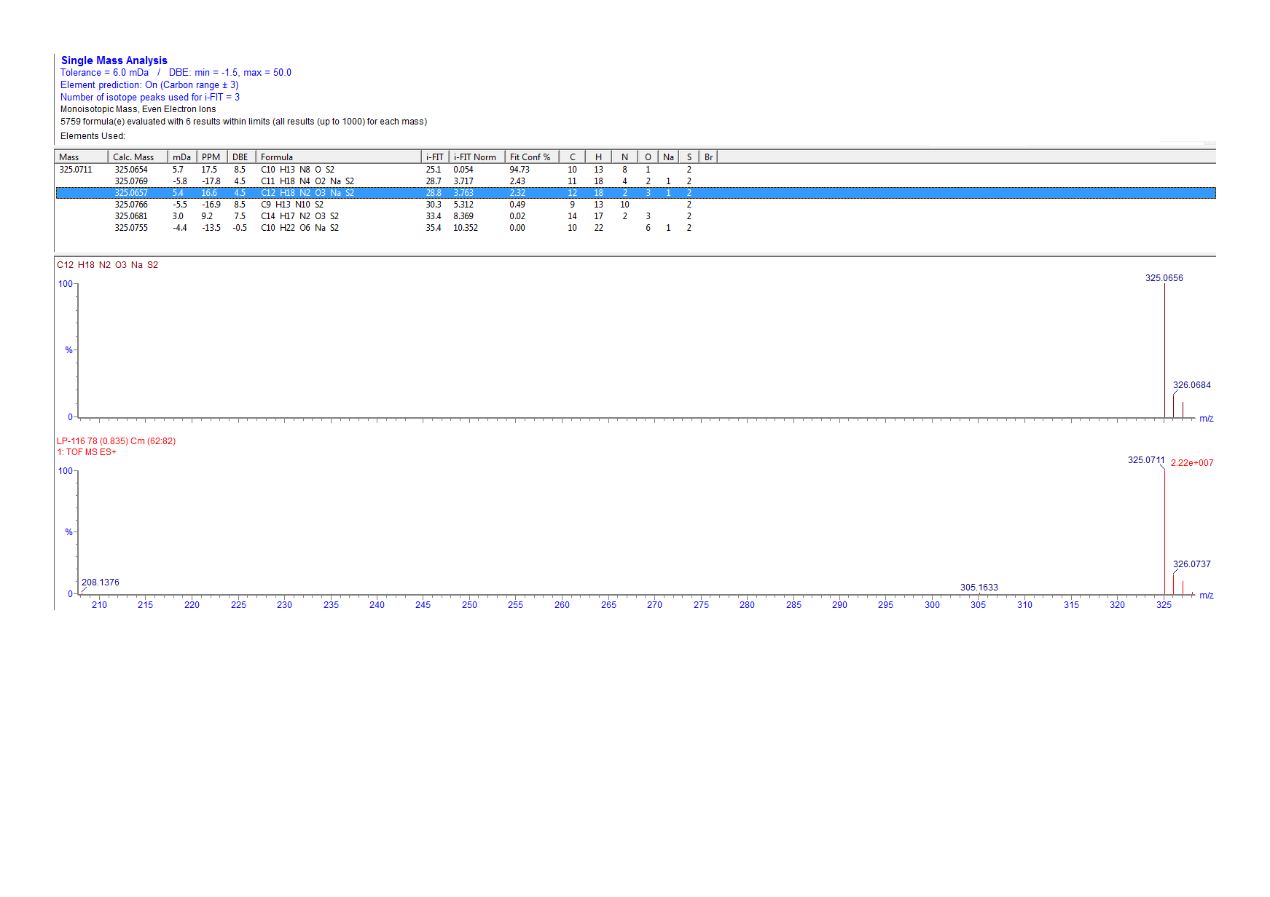


**Figure S 42.** HRMS (ESI) of compound **4­­n**


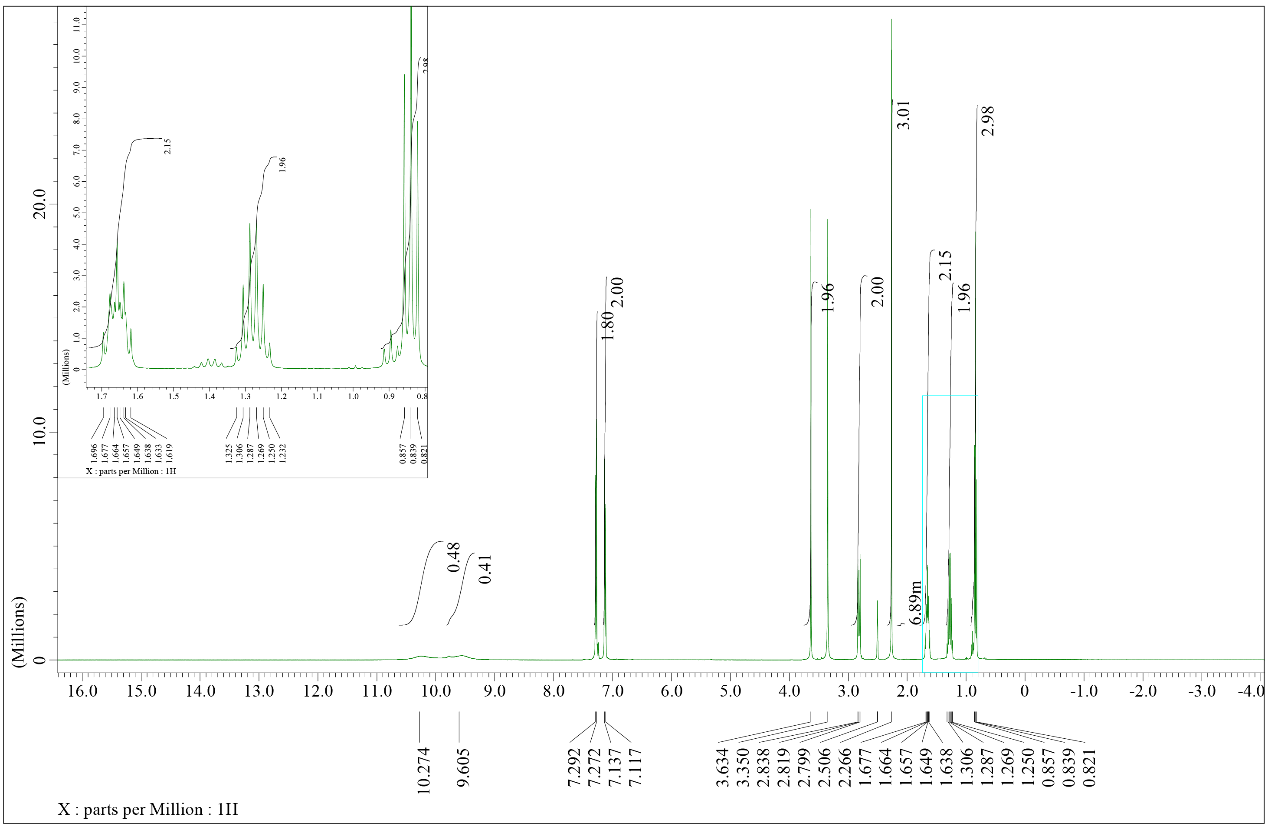


**Figure S 43.** 1H NMR of compound **4o**


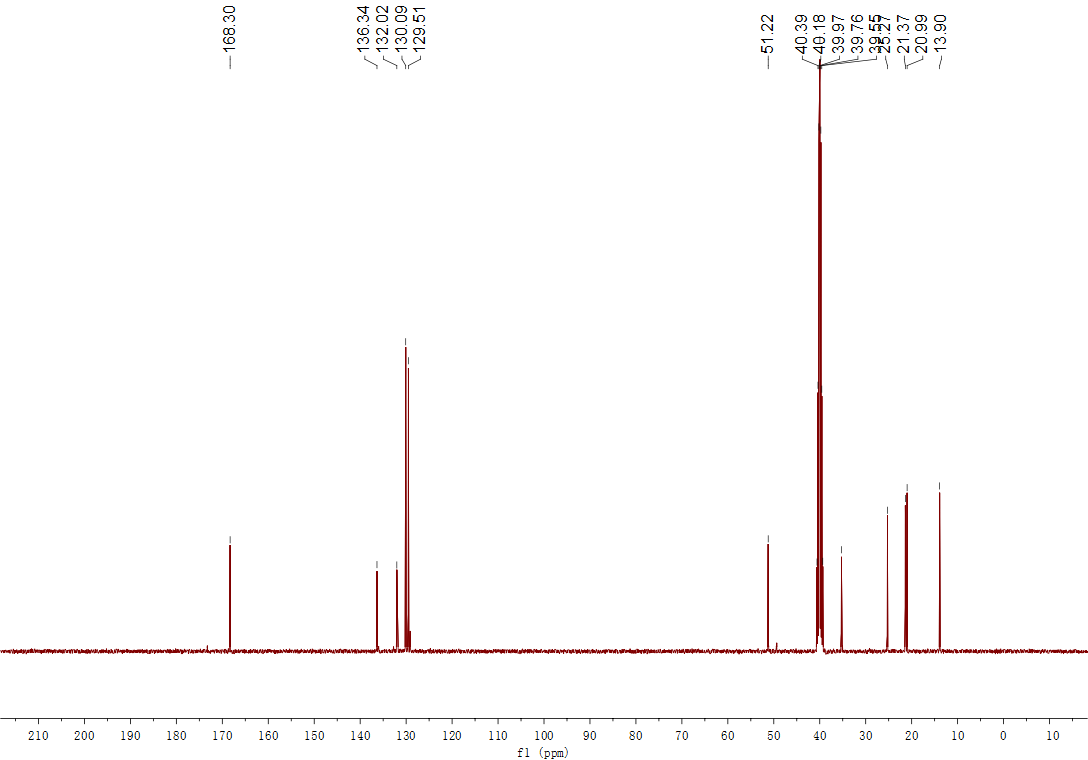


**Figure S 44.** 13C NMR of compound **4o**


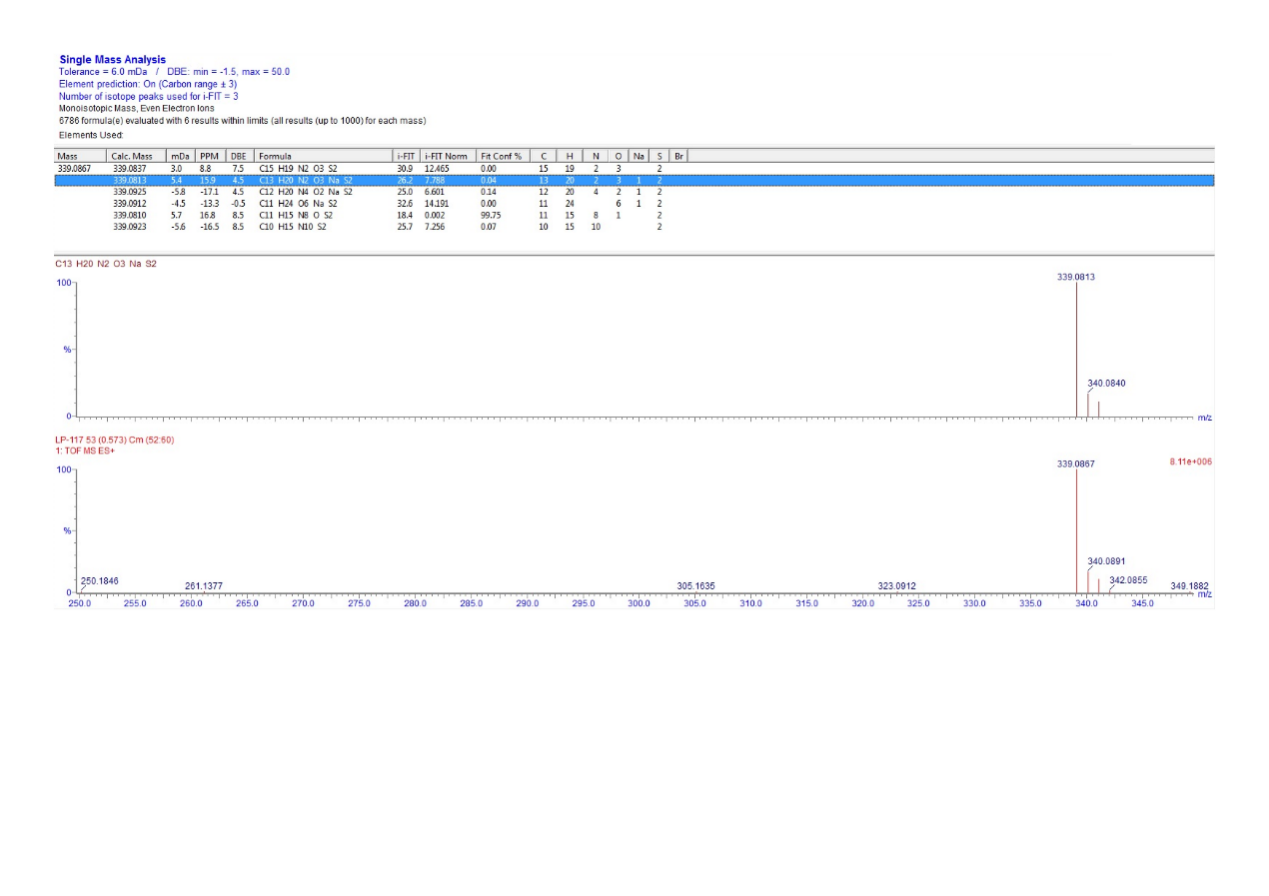


**Figure S 45.** HRMS (ESI) of compound **4­­o**


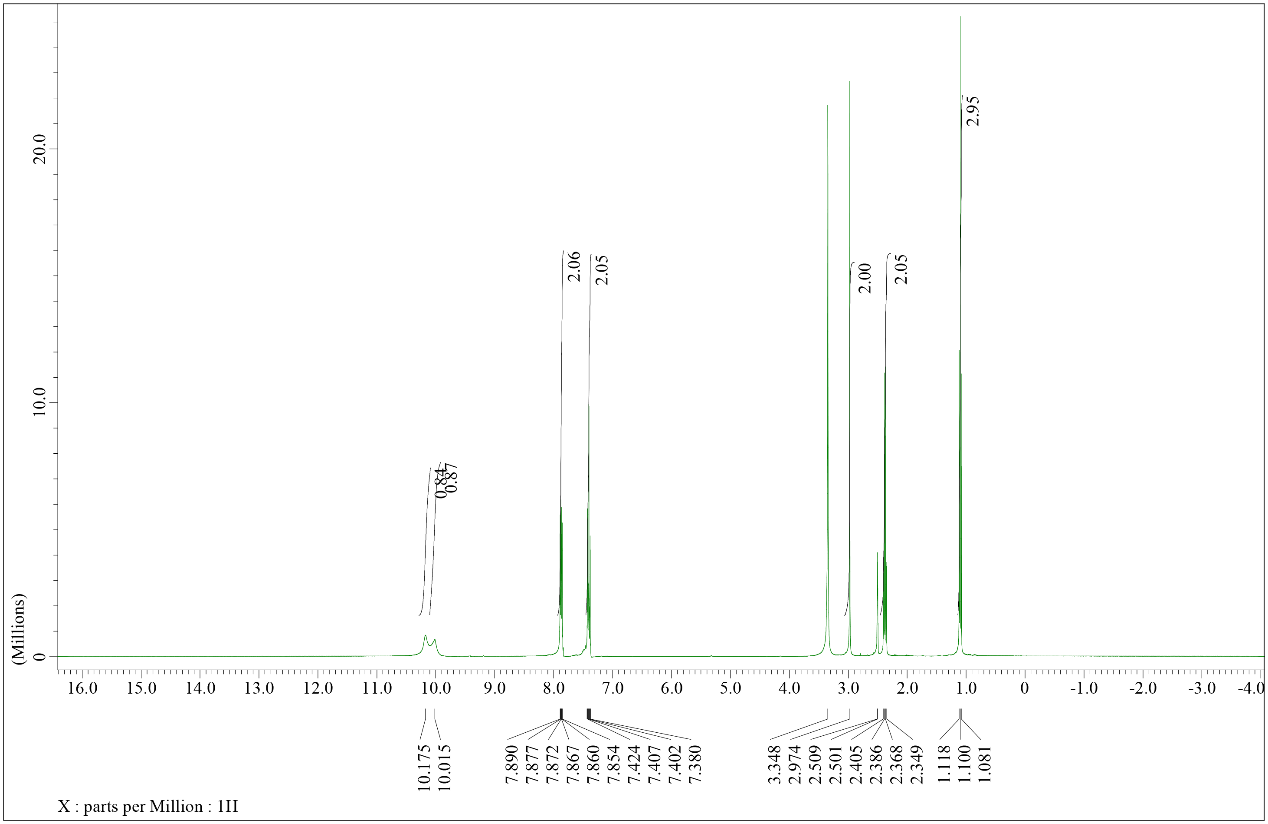


**Figure S 46.** 1H NMR of compound **4p**


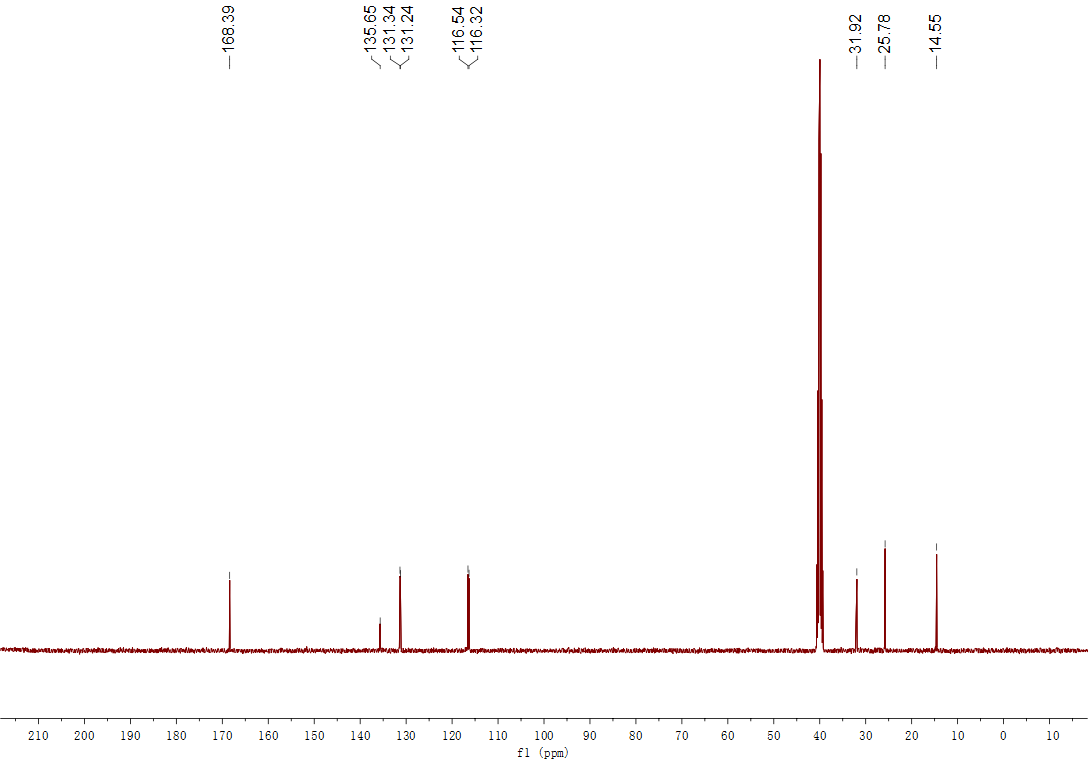


**Figure S 47.** 13C NMR of compound **4p**


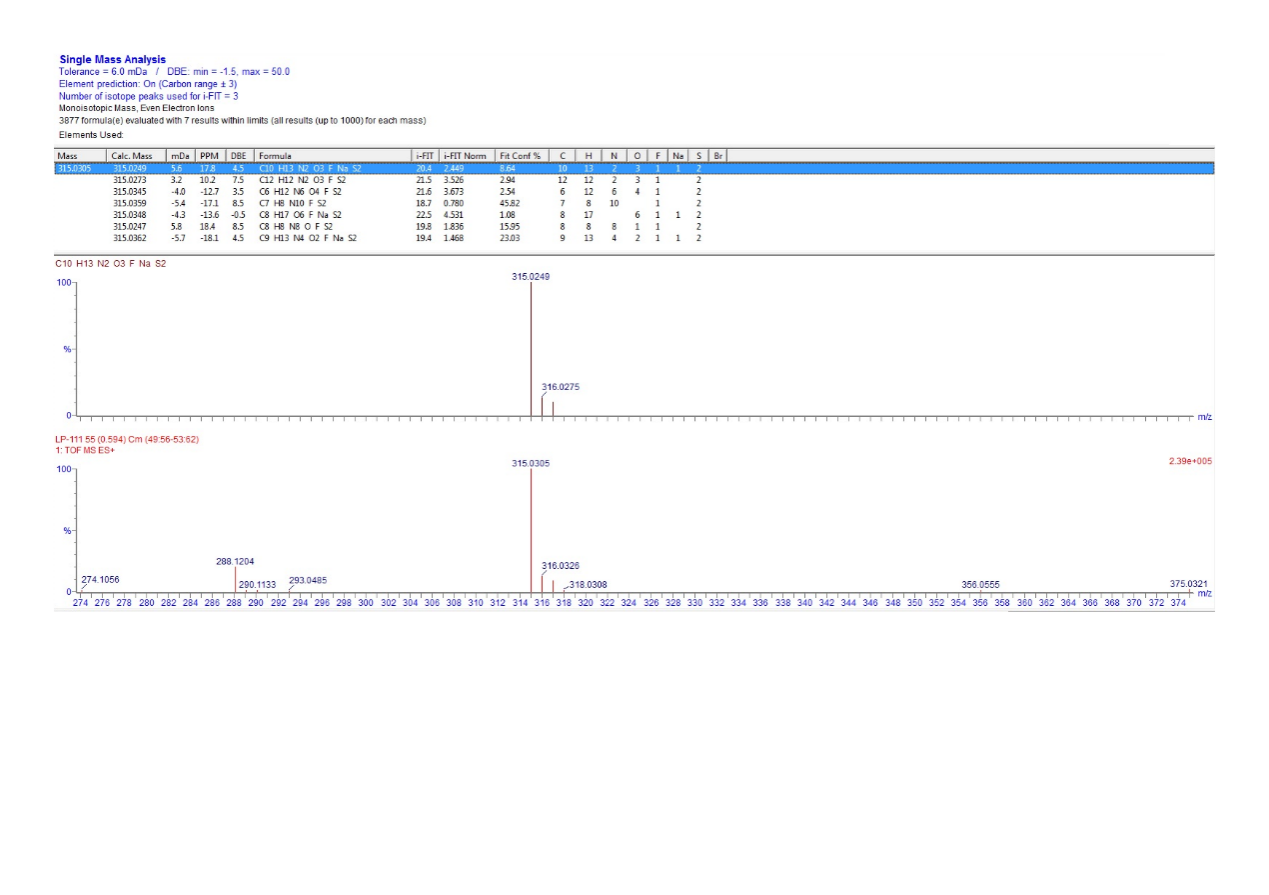


**Figure S 48.** HRMS (ESI) of compound **4p**
